# Supplementary material for: Adjunctive host-directed therapies for pulmonary tuberculosis: a prospective, open-label, phase 2, randomised controlled trial
Source: PubMed Central journal article supplement (PMC8332197; doi:10.1016/s2213-2600(20)30448-3), 2021-08
Supplement: mmc1.pdf [file mmc1.pdf]

# THE LANCET

## Respiratory Medicine

### Supplementary appendix

This appendix formed part of the original submission and has been peer reviewed. We post it as supplied by the authors.

Supplement to: Wallis RS, Ginindza S, Beattie T, et al. Adjunctive host-directed therapies for pulmonary tuberculosis: a prospective, open-label, phase 2, randomised controlled trial. *Lancet Respir Med* 2021; published online March 16. [http://dx.doi.org/10.1016/S2213-2600\(20\)30448-3](http://dx.doi.org/10.1016/S2213-2600(20)30448-3).

## TB-HDT Web Appendix

## Table of contents

|                                                                                                                |    |
|----------------------------------------------------------------------------------------------------------------|----|
| <b>Table S1.</b> Summary of Adverse Events by Maximum Severity and MedDRA Preferred Term .....                 | 2  |
| <b>Table S2.</b> Hazard ratio (HR) for SSC in the mITT population relative to control.....                     | 23 |
| <b>Table S3.</b> Hazard ratio (HR) for SSC in the PP population relative to control, liquid cultures only..... | 24 |
| <b>Table S4.</b> Spirometry outcomes in the mITT population.....                                               | 25 |
| <b>Table S5.</b> Spirometry outcomes in the PP population, including an adjustment for site.....               | 26 |
| <b>Table S6.</b> Effects on FEV1 at 6 months considering only ATS/ERS grade categories A-D.....                | 27 |
| <b>Table S7.</b> Effects on FEV1 over time in the mITT population using a random effects model. ....           | 28 |
| <b>Table S8.</b> Criteria for classifying radiographic extent of disease in tuberculosis. ....                 | 29 |

**Table S1.** Summary of Adverse Events by Maximum Severity and MedDRA Preferred Term

Intent-to-Treat (Safety) Population

Note: Patients are counted once for each preferred term and once for each system organ class (SOC) per the greatest severity. SOC's are sorted in alphabetic order, and preferred terms are sorted in alphabetic order within SOC's.

| System Organ Class Preferred Term Severity  | Control (N=40) | CC-11050 (N=40) | Everolimus (N=39) | Auranofin (N=40) | Vitamin D (N=40) | Total (N=199) |
|---------------------------------------------|----------------|-----------------|-------------------|------------------|------------------|---------------|
| <b>Any Event</b>                            | 34 (85.0)      | 36 (90.0)       | 32 (82.1)         | 36 (90.0)        | 39 (97.5)        | 177 (88.9)    |
| Mild                                        | 11 (27.5)      | 15 (37.5)       | 12 (30.8)         | 15 (37.5)        | 19 (47.5)        | 72 (36.2)     |
| Moderate                                    | 19 (47.5)      | 19 (47.5)       | 19 (48.7)         | 17 (42.5)        | 16 (40.0)        | 90 (45.2)     |
| Severe                                      | 4 (10.0)       | 2 (5.0)         | 1 (2.6)           | 4 (10.0)         | 4 (10.0)         | 15 (7.5)      |
| <b>Blood and lymphatic system disorders</b> | 2 (5.0)        | 10 (25.0)       | 6 (15.4)          | 4 (10.0)         | 5 (12.5)         | 27 (13.6)     |
| Mild                                        | 2 (5.0)        | 6 (15.0)        | 3 (7.7)           | 3 (7.5)          | 3 (7.5)          | 17 (8.5)      |
| Moderate                                    | 0              | 4 (10.0)        | 3 (7.7)           | 0                | 1 (2.5)          | 8 (4.0)       |
| Severe                                      | 0              | 0               | 0                 | 1 (2.5)          | 1 (2.5)          | 2 (1.0)       |
| Anaemia                                     | 0              | 3 (7.5)         | 2 (5.1)           | 1 (2.5)          | 2 (5.0)          | 8 (4.0)       |
| Mild                                        | 0              | 3 (7.5)         | 1 (2.6)           | 1 (2.5)          | 2 (5.0)          | 7 (3.5)       |
| Moderate                                    | 0              | 0               | 1 (2.6)           | 0                | 0                | 1 (0.5)       |
| Severe                                      | 0              | 0               | 0                 | 0                | 0                | 0             |
| Hypochromic anaemia                         | 1 (2.5)        | 1 (2.5)         | 0                 | 0                | 0                | 2 (1.0)       |
| Mild                                        | 1 (2.5)        | 1 (2.5)         | 0                 | 0                | 0                | 2 (1.0)       |
| Moderate                                    | 0              | 0               | 0                 | 0                | 0                | 0             |
| Severe                                      | 0              | 0               | 0                 | 0                | 0                | 0             |
| Leukopenia                                  | 0              | 2 (5.0)         | 1 (2.6)           | 0                | 2 (5.0)          | 5 (2.5)       |
| Mild                                        | 0              | 1 (2.5)         | 1 (2.6)           | 0                | 1 (2.5)          | 3 (1.5)       |
| Moderate                                    | 0              | 1 (2.5)         | 0                 | 0                | 1 (2.5)          | 2 (1.0)       |
| Severe                                      | 0              | 0               | 0                 | 0                | 0                | 0             |
| Lymphadenopathy                             | 0              | 1 (2.5)         | 1 (2.6)           | 0                | 0                | 2 (1.0)       |
| Mild                                        | 0              | 1 (2.5)         | 1 (2.6)           | 0                | 0                | 2 (1.0)       |
| Moderate                                    | 0              | 0               | 0                 | 0                | 0                | 0             |
| Severe                                      | 0              | 0               | 0                 | 0                | 0                | 0             |
| Lymphopenia                                 | 0              | 1 (2.5)         | 1 (2.6)           | 0                | 2 (5.0)          | 4 (2.0)       |
| Mild                                        | 0              | 1 (2.5)         | 0                 | 0                | 1 (2.5)          | 2 (1.0)       |
| Moderate                                    | 0              | 0               | 1 (2.6)           | 0                | 0                | 1 (0.5)       |
| Severe                                      | 0              | 0               | 0                 | 0                | 1 (2.5)          | 1 (0.5)       |
| Neutropenia                                 | 0              | 2 (5.0)         | 0                 | 0                | 1 (2.5)          | 3 (1.5)       |
| Mild                                        | 0              | 2 (5.0)         | 0                 | 0                | 0                | 2 (1.0)       |
| Moderate                                    | 0              | 0               | 0                 | 0                | 1 (2.5)          | 1 (0.5)       |

| System Organ Class Preferred Term Severity | Control (N=40) | CC-11050 (N=40) | Everolimus (N=39) | Auranofin (N=40) | Vitamin D (N=40) | Total (N=199) |
|--------------------------------------------|----------------|-----------------|-------------------|------------------|------------------|---------------|
| Severe                                     | 0              | 0               | 0                 | 0                | 0                | 0             |
| Thrombocytopenia                           | 0              | 1 (2.5)         | 0                 | 1 (2.5)          | 1 (2.5)          | 3 (1.5)       |
| Mild                                       | 0              | 1 (2.5)         | 0                 | 0                | 0                | 1 (0.5)       |
| Moderate                                   | 0              | 0               | 0                 | 0                | 1 (2.5)          | 1 (0.5)       |
| Severe                                     | 0              | 0               | 0                 | 1 (2.5)          | 0                | 1 (0.5)       |
| Thrombocytosis                             | 0              | 2 (5.0)         | 1 (2.6)           | 2 (5.0)          | 0                | 5 (2.5)       |
| Mild                                       | 0              | 0               | 0                 | 2 (5.0)          | 0                | 2 (1.0)       |
| Moderate                                   | 0              | 2 (5.0)         | 1 (2.6)           | 0                | 0                | 3 (1.5)       |
| Severe                                     | 0              | 0               | 0                 | 0                | 0                | 0             |
| White blood cell disorder                  | 1 (2.5)        | 1 (2.5)         | 0                 | 0                | 0                | 2 (1.0)       |
| Mild                                       | 1 (2.5)        | 0               | 0                 | 0                | 0                | 1 (0.5)       |
| Moderate                                   | 0              | 1 (2.5)         | 0                 | 0                | 0                | 1 (0.5)       |
| Severe                                     | 0              | 0               | 0                 | 0                | 0                | 0             |
| <b>Cardiac disorders</b>                   | 4 (10.0)       | 5 (12.5)        | 1 (2.6)           | 3 (7.5)          | 5 (12.5)         | 18 (9.0)      |
| Mild                                       | 4 (10.0)       | 5 (12.5)        | 1 (2.6)           | 3 (7.5)          | 5 (12.5)         | 18 (9.0)      |
| Moderate                                   | 0              | 0               | 0                 | 0                | 0                | 0             |
| Severe                                     | 0              | 0               | 0                 | 0                | 0                | 0             |
| AV block first degree                      | 0              | 2 (5.0)         | 0                 | 0                | 0                | 2 (1.0)       |
| Mild                                       | 0              | 2 (5.0)         | 0                 | 0                | 0                | 2 (1.0)       |
| Moderate                                   | 0              | 0               | 0                 | 0                | 0                | 0             |
| Severe                                     | 0              | 0               | 0                 | 0                | 0                | 0             |
| Bradycardia                                | 2 (5.0)        | 2 (5.0)         | 1 (2.6)           | 2 (5.0)          | 2 (5.0)          | 9 (4.5)       |
| Mild                                       | 2 (5.0)        | 2 (5.0)         | 1 (2.6)           | 2 (5.0)          | 2 (5.0)          | 9 (4.5)       |
| Moderate                                   | 0              | 0               | 0                 | 0                | 0                | 0             |
| Severe                                     | 0              | 0               | 0                 | 0                | 0                | 0             |
| LVH                                        | 0              | 0               | 0                 | 1 (2.5)          | 0                | 1 (0.5)       |
| Mild                                       | 0              | 0               | 0                 | 1 (2.5)          | 0                | 1 (0.5)       |
| Moderate                                   | 0              | 0               | 0                 | 0                | 0                | 0             |
| Severe                                     | 0              | 0               | 0                 | 0                | 0                | 0             |
| Palpitations                               | 1 (2.5)        | 0               | 0                 | 0                | 0                | 1 (0.5)       |
| Mild                                       | 1 (2.5)        | 0               | 0                 | 0                | 0                | 1 (0.5)       |
| Moderate                                   | 0              | 0               | 0                 | 0                | 0                | 0             |
| Severe                                     | 0              | 0               | 0                 | 0                | 0                | 0             |
| Tachycardia                                | 1 (2.5)        | 2 (5.0)         | 0                 | 0                | 3 (7.5)          | 6 (3.0)       |
| Mild                                       | 1 (2.5)        | 2 (5.0)         | 0                 | 0                | 3 (7.5)          | 6 (3.0)       |
| Moderate                                   | 0              | 0               | 0                 | 0                | 0                | 0             |
| Severe                                     | 0              | 0               | 0                 | 0                | 0                | 0             |
| <b>Ear and labyrinth disorders</b>         | 0              | 0               | 1 (2.6)           | 1 (2.5)          | 0                | 2 (1.0)       |

| System Organ Class Preferred Term Severity | Control (N=40) | CC-11050 (N=40) | Everolimus (N=39) | Auranofin (N=40) | Vitamin D (N=40) | Total (N=199) |
|--------------------------------------------|----------------|-----------------|-------------------|------------------|------------------|---------------|
| Mild                                       | 0              | 0               | 1 (2.6)           | 1 (2.5)          | 0                | 2 (1.0)       |
| Moderate                                   | 0              | 0               | 0                 | 0                | 0                | 0             |
| Severe                                     | 0              | 0               | 0                 | 0                | 0                | 0             |
| Ear congestion                             | 0              | 0               | 1 (2.6)           | 0                | 0                | 1 (0.5)       |
| Mild                                       | 0              | 0               | 1 (2.6)           | 0                | 0                | 1 (0.5)       |
| Moderate                                   | 0              | 0               | 0                 | 0                | 0                | 0             |
| Severe                                     | 0              | 0               | 0                 | 0                | 0                | 0             |
| Ear pain                                   | 0              | 0               | 0                 | 1 (2.5)          | 0                | 1 (0.5)       |
| Mild                                       | 0              | 0               | 0                 | 1 (2.5)          | 0                | 1 (0.5)       |
| Moderate                                   | 0              | 0               | 0                 | 0                | 0                | 0             |
| Severe                                     | 0              | 0               | 0                 | 0                | 0                | 0             |
| Excessive cerumen production               | 0              | 0               | 1 (2.6)           | 0                | 0                | 1 (0.5)       |
| Mild                                       | 0              | 0               | 1 (2.6)           | 0                | 0                | 1 (0.5)       |
| Moderate                                   | 0              | 0               | 0                 | 0                | 0                | 0             |
| Severe                                     | 0              | 0               | 0                 | 0                | 0                | 0             |
| <b>Eye disorders</b>                       | 1 (2.5)        | 0               | 0                 | 2 (5.0)          | 0                | 3 (1.5)       |
| Mild                                       | 1 (2.5)        | 0               | 0                 | 2 (5.0)          | 0                | 3 (1.5)       |
| Moderate                                   | 0              | 0               | 0                 | 0                | 0                | 0             |
| Severe                                     | 0              | 0               | 0                 | 0                | 0                | 0             |
| Eye pruritus                               | 1 (2.5)        | 0               | 0                 | 1 (2.5)          | 0                | 2 (1.0)       |
| Mild                                       | 1 (2.5)        | 0               | 0                 | 1 (2.5)          | 0                | 2 (1.0)       |
| Moderate                                   | 0              | 0               | 0                 | 0                | 0                | 0             |
| Severe                                     | 0              | 0               | 0                 | 0                | 0                | 0             |
| Ocular hyperaemia                          | 0              | 0               | 0                 | 1 (2.5)          | 0                | 1 (0.5)       |
| Mild                                       | 0              | 0               | 0                 | 1 (2.5)          | 0                | 1 (0.5)       |
| Moderate                                   | 0              | 0               | 0                 | 0                | 0                | 0             |
| Severe                                     | 0              | 0               | 0                 | 0                | 0                | 0             |
| <b>Gastrointestinal disorders</b>          | 7 (17.5)       | 4 (10.0)        | 9 (23.1)          | 14 (35.0)        | 8 (20.0)         | 42 (21.1)     |
| Mild                                       | 4 (10.0)       | 1 (2.5)         | 3 (7.7)           | 10 (25.0)        | 5 (12.5)         | 23 (11.6)     |
| Moderate                                   | 3 (7.5)        | 3 (7.5)         | 6 (15.4)          | 4 (10.0)         | 3 (7.5)          | 19 (9.5)      |
| Severe                                     | 0              | 0               | 0                 | 0                | 0                | 0             |
| Abdominal discomfort                       | 1 (2.5)        | 0               | 0                 | 0                | 0                | 1 (0.5)       |
| Mild                                       | 1 (2.5)        | 0               | 0                 | 0                | 0                | 1 (0.5)       |
| Moderate                                   | 0              | 0               | 0                 | 0                | 0                | 0             |
| Severe                                     | 0              | 0               | 0                 | 0                | 0                | 0             |
| Abdominal pain                             | 2 (5.0)        | 0               | 3 (7.7)           | 2 (5.0)          | 2 (5.0)          | 9 (4.5)       |
| Mild                                       | 2 (5.0)        | 0               | 3 (7.7)           | 2 (5.0)          | 1 (2.5)          | 8 (4.0)       |

| System Organ Class Preferred Term Severity | Control (N=40) | CC-11050 (N=40) | Everolimus (N=39) | Auranofin (N=40) | Vitamin D (N=40) | Total (N=199) |
|--------------------------------------------|----------------|-----------------|-------------------|------------------|------------------|---------------|
| Moderate                                   | 0              | 0               | 0                 | 0                | 1 (2.5)          | 1 (0.5)       |
| Severe                                     | 0              | 0               | 0                 | 0                | 0                | 0             |
| Abdominal pain lower                       | 0              | 1 (2.5)         | 0                 | 0                | 0                | 1 (0.5)       |
| Mild                                       | 0              | 0               | 0                 | 0                | 0                | 0             |
| Moderate                                   | 0              | 1 (2.5)         | 0                 | 0                | 0                | 1 (0.5)       |
| Severe                                     | 0              | 0               | 0                 | 0                | 0                | 0             |
| Abdominal pain upper                       | 1 (2.5)        | 0               | 0                 | 1 (2.5)          | 0                | 2 (1.0)       |
| Mild                                       | 0              | 0               | 0                 | 1 (2.5)          | 0                | 1 (0.5)       |
| Moderate                                   | 1 (2.5)        | 0               | 0                 | 0                | 0                | 1 (0.5)       |
| Severe                                     | 0              | 0               | 0                 | 0                | 0                | 0             |
| Abdominal tenderness                       | 1 (2.5)        | 0               | 0                 | 1 (2.5)          | 1 (2.5)          | 3 (1.5)       |
| Mild                                       | 1 (2.5)        | 0               | 0                 | 1 (2.5)          | 1 (2.5)          | 3 (1.5)       |
| Moderate                                   | 0              | 0               | 0                 | 0                | 0                | 0             |
| Severe                                     | 0              | 0               | 0                 | 0                | 0                | 0             |
| Constipation                               | 2 (5.0)        | 0               | 0                 | 1 (2.5)          | 2 (5.0)          | 5 (2.5)       |
| Mild                                       | 2 (5.0)        | 0               | 0                 | 1 (2.5)          | 2 (5.0)          | 5 (2.5)       |
| Moderate                                   | 0              | 0               | 0                 | 0                | 0                | 0             |
| Severe                                     | 0              | 0               | 0                 | 0                | 0                | 0             |
| Dental caries                              | 0              | 1 (2.5)         | 1 (2.6)           | 0                | 0                | 2 (1.0)       |
| Mild                                       | 0              | 0               | 0                 | 0                | 0                | 0             |
| Moderate                                   | 0              | 1 (2.5)         | 1 (2.6)           | 0                | 0                | 2 (1.0)       |
| Severe                                     | 0              | 0               | 0                 | 0                | 0                | 0             |
| Diarrhoea                                  | 1 (2.5)        | 0               | 1 (2.6)           | 7 (17.5)         | 2 (5.0)          | 11 (5.5)      |
| Mild                                       | 1 (2.5)        | 0               | 0                 | 3 (7.5)          | 2 (5.0)          | 6 (3.0)       |
| Moderate                                   | 0              | 0               | 1 (2.6)           | 4 (10.0)         | 0                | 5 (2.5)       |
| Severe                                     | 0              | 0               | 0                 | 0                | 0                | 0             |
| Dyspepsia                                  | 1 (2.5)        | 0               | 0                 | 0                | 0                | 1 (0.5)       |
| Mild                                       | 1 (2.5)        | 0               | 0                 | 0                | 0                | 1 (0.5)       |
| Moderate                                   | 0              | 0               | 0                 | 0                | 0                | 0             |
| Severe                                     | 0              | 0               | 0                 | 0                | 0                | 0             |
| Gastritis                                  | 0              | 0               | 0                 | 1 (2.5)          | 1 (2.5)          | 2 (1.0)       |
| Mild                                       | 0              | 0               | 0                 | 1 (2.5)          | 0                | 1 (0.5)       |
| Moderate                                   | 0              | 0               | 0                 | 0                | 1 (2.5)          | 1 (0.5)       |
| Severe                                     | 0              | 0               | 0                 | 0                | 0                | 0             |
| GE reflux disease                          | 0              | 0               | 0                 | 1 (2.5)          | 0                | 1 (0.5)       |
| Mild                                       | 0              | 0               | 0                 | 1 (2.5)          | 0                | 1 (0.5)       |
| Moderate                                   | 0              | 0               | 0                 | 0                | 0                | 0             |
| Severe                                     | 0              | 0               | 0                 | 0                | 0                | 0             |

| System Organ Class Preferred Term Severity                  | Control (N=40) | CC-11050 (N=40) | Everolimus (N=39) | Auranofin (N=40) | Vitamin D (N=40) | Total (N=199) |
|-------------------------------------------------------------|----------------|-----------------|-------------------|------------------|------------------|---------------|
| Haemorrhoids                                                | 1 (2.5)        | 0               | 0                 | 1 (2.5)          | 0                | 2 (1.0)       |
| Mild                                                        | 0              | 0               | 0                 | 1 (2.5)          | 0                | 1 (0.5)       |
| Moderate                                                    | 1 (2.5)        | 0               | 0                 | 0                | 0                | 1 (0.5)       |
| Severe                                                      | 0              | 0               | 0                 | 0                | 0                | 0             |
| Hyperaesthesia teeth                                        | 1 (2.5)        | 0               | 0                 | 0                | 0                | 1 (0.5)       |
| Mild                                                        | 1 (2.5)        | 0               | 0                 | 0                | 0                | 1 (0.5)       |
| Moderate                                                    | 0              | 0               | 0                 | 0                | 0                | 0             |
| Severe                                                      | 0              | 0               | 0                 | 0                | 0                | 0             |
| Nausea                                                      | 2 (5.0)        | 1 (2.5)         | 0                 | 1 (2.5)          | 0                | 4 (2.0)       |
| Mild                                                        | 2 (5.0)        | 0               | 0                 | 0                | 0                | 2 (1.0)       |
| Moderate                                                    | 0              | 1 (2.5)         | 0                 | 1 (2.5)          | 0                | 2 (1.0)       |
| Severe                                                      | 0              | 0               | 0                 | 0                | 0                | 0             |
| Pancreatitis acute                                          | 0              | 0               | 0                 | 0                | 1 (2.5)          | 1 (0.5)       |
| Mild                                                        | 0              | 0               | 0                 | 0                | 0                | 0             |
| Moderate                                                    | 0              | 0               | 0                 | 0                | 1 (2.5)          | 1 (0.5)       |
| Severe                                                      | 0              | 0               | 0                 | 0                | 0                | 0             |
| Peptic ulcer                                                | 0              | 0               | 3 (7.7)           | 0                | 0                | 3 (1.5)       |
| Mild                                                        | 0              | 0               | 1 (2.6)           | 0                | 0                | 1 (0.5)       |
| Moderate                                                    | 0              | 0               | 2 (5.1)           | 0                | 0                | 2 (1.0)       |
| Severe                                                      | 0              | 0               | 0                 | 0                | 0                | 0             |
| Salivary hypersecretion                                     | 0              | 0               | 1 (2.6)           | 0                | 0                | 1 (0.5)       |
| Mild                                                        | 0              | 0               | 1 (2.6)           | 0                | 0                | 1 (0.5)       |
| Moderate                                                    | 0              | 0               | 0                 | 0                | 0                | 0             |
| Severe                                                      | 0              | 0               | 0                 | 0                | 0                | 0             |
| Toothache                                                   | 0              | 0               | 1 (2.6)           | 1 (2.5)          | 0                | 2 (1.0)       |
| Mild                                                        | 0              | 0               | 0                 | 0                | 0                | 0             |
| Moderate                                                    | 0              | 0               | 1 (2.6)           | 1 (2.5)          | 0                | 2 (1.0)       |
| Severe                                                      | 0              | 0               | 0                 | 0                | 0                | 0             |
| Vomiting                                                    | 2 (5.0)        | 1 (2.5)         | 2 (5.1)           | 4 (10.0)         | 3 (7.5)          | 12 (6.0)      |
| Mild                                                        | 1 (2.5)        | 1 (2.5)         | 1 (2.6)           | 3 (7.5)          | 3 (7.5)          | 9 (4.5)       |
| Moderate                                                    | 1 (2.5)        | 0               | 1 (2.6)           | 1 (2.5)          | 0                | 3 (1.5)       |
| Severe                                                      | 0              | 0               | 0                 | 0                | 0                | 0             |
| <b>General disorders and administration site conditions</b> | 5 (12.5)       | 8 (20.0)        | 5 (12.8)          | 7 (17.5)         | 8 (20.0)         | 33 (16.6)     |
| Mild                                                        | 4 (10.0)       | 5 (12.5)        | 3 (7.7)           | 4 (10.0)         | 5 (12.5)         | 21 (10.6)     |
| Moderate                                                    | 1 (2.5)        | 3 (7.5)         | 2 (5.1)           | 3 (7.5)          | 3 (7.5)          | 12 (6.0)      |
| Severe                                                      | 0              | 0               | 0                 | 0                | 0                | 0             |
| Adverse drug reaction                                       | 0              | 0               | 0                 | 0                | 1 (2.5)          | 1 (0.5)       |

| System Organ Class Preferred Term Severity | Control (N=40) | CC-11050 (N=40) | Everolimus (N=39) | Auranofin (N=40) | Vitamin D (N=40) | Total (N=199) |
|--------------------------------------------|----------------|-----------------|-------------------|------------------|------------------|---------------|
| Mild                                       | 0              | 0               | 0                 | 0                | 1 (2.5)          | 1 (0.5)       |
| Moderate                                   | 0              | 0               | 0                 | 0                | 0                | 0             |
| Severe                                     | 0              | 0               | 0                 | 0                | 0                | 0             |
| Adverse event                              | 2 (5.0)        | 2 (5.0)         | 0                 | 1 (2.5)          | 0                | 5 (2.5)       |
| Mild                                       | 2 (5.0)        | 2 (5.0)         | 0                 | 1 (2.5)          | 0                | 5 (2.5)       |
| Moderate                                   | 0              | 0               | 0                 | 0                | 0                | 0             |
| Severe                                     | 0              | 0               | 0                 | 0                | 0                | 0             |
| Asthenia                                   | 0              | 2 (5.0)         | 1 (2.6)           | 1 (2.5)          | 1 (2.5)          | 5 (2.5)       |
| Mild                                       | 0              | 2 (5.0)         | 1 (2.6)           | 0                | 1 (2.5)          | 4 (2.0)       |
| Moderate                                   | 0              | 0               | 0                 | 1 (2.5)          | 0                | 1 (0.5)       |
| Severe                                     | 0              | 0               | 0                 | 0                | 0                | 0             |
| Chills                                     | 0              | 1 (2.5)         | 0                 | 0                | 1 (2.5)          | 2 (1.0)       |
| Mild                                       | 0              | 1 (2.5)         | 0                 | 0                | 1 (2.5)          | 2 (1.0)       |
| Moderate                                   | 0              | 0               | 0                 | 0                | 0                | 0             |
| Severe                                     | 0              | 0               | 0                 | 0                | 0                | 0             |
| Crepitations                               | 0              | 0               | 0                 | 1 (2.5)          | 0                | 1 (0.5)       |
| Mild                                       | 0              | 0               | 0                 | 1 (2.5)          | 0                | 1 (0.5)       |
| Moderate                                   | 0              | 0               | 0                 | 0                | 0                | 0             |
| Severe                                     | 0              | 0               | 0                 | 0                | 0                | 0             |
| Fatigue                                    | 1 (2.5)        | 1 (2.5)         | 0                 | 0                | 0                | 2 (1.0)       |
| Mild                                       | 1 (2.5)        | 1 (2.5)         | 0                 | 0                | 0                | 2 (1.0)       |
| Moderate                                   | 0              | 0               | 0                 | 0                | 0                | 0             |
| Severe                                     | 0              | 0               | 0                 | 0                | 0                | 0             |
| Feeling cold                               | 0              | 0               | 0                 | 0                | 1 (2.5)          | 1 (0.5)       |
| Mild                                       | 0              | 0               | 0                 | 0                | 1 (2.5)          | 1 (0.5)       |
| Moderate                                   | 0              | 0               | 0                 | 0                | 0                | 0             |
| Severe                                     | 0              | 0               | 0                 | 0                | 0                | 0             |
| Feeling hot                                | 0              | 1 (2.5)         | 0                 | 0                | 0                | 1 (0.5)       |
| Mild                                       | 0              | 1 (2.5)         | 0                 | 0                | 0                | 1 (0.5)       |
| Moderate                                   | 0              | 0               | 0                 | 0                | 0                | 0             |
| Severe                                     | 0              | 0               | 0                 | 0                | 0                | 0             |
| Influenza like illness                     | 0              | 0               | 0                 | 0                | 1 (2.5)          | 1 (0.5)       |
| Mild                                       | 0              | 0               | 0                 | 0                | 1 (2.5)          | 1 (0.5)       |
| Moderate                                   | 0              | 0               | 0                 | 0                | 0                | 0             |
| Severe                                     | 0              | 0               | 0                 | 0                | 0                | 0             |
| Injection site pain                        | 0              | 0               | 0                 | 0                | 2 (5.0)          | 2 (1.0)       |
| Mild                                       | 0              | 0               | 0                 | 0                | 2 (5.0)          | 2 (1.0)       |
| Moderate                                   | 0              | 0               | 0                 | 0                | 0                | 0             |



| System Organ Class Preferred Term Severity | Control (N=40) | CC-11050 (N=40) | Everolimus (N=39) | Auranofin (N=40) | Vitamin D (N=40) | Total (N=199) |
|--------------------------------------------|----------------|-----------------|-------------------|------------------|------------------|---------------|
| Severe                                     | 0              | 0               | 0                 | 0                | 0                | 0             |
| Oedema peripheral                          | 0              | 1 (2.5)         | 0                 | 0                | 0                | 1 (0.5)       |
| Mild                                       | 0              | 0               | 0                 | 0                | 0                | 0             |
| Moderate                                   | 0              | 1 (2.5)         | 0                 | 0                | 0                | 1 (0.5)       |
| Severe                                     | 0              | 0               | 0                 | 0                | 0                | 0             |
| Pain                                       | 1 (2.5)        | 1 (2.5)         | 0                 | 1 (2.5)          | 0                | 3 (1.5)       |
| Mild                                       | 1 (2.5)        | 1 (2.5)         | 0                 | 1 (2.5)          | 0                | 3 (1.5)       |
| Moderate                                   | 0              | 0               | 0                 | 0                | 0                | 0             |
| Severe                                     | 0              | 0               | 0                 | 0                | 0                | 0             |
| Paradoxical drug reaction                  | 0              | 3 (7.5)         | 3 (7.7)           | 2 (5.0)          | 3 (7.5)          | 11 (5.5)      |
| Mild                                       | 0              | 1 (2.5)         | 1 (2.6)           | 0                | 0                | 2 (1.0)       |
| Moderate                                   | 0              | 2 (5.0)         | 2 (5.1)           | 2 (5.0)          | 3 (7.5)          | 9 (4.5)       |
| Severe                                     | 0              | 0               | 0                 | 0                | 0                | 0             |
| Peripheral swelling                        | 0              | 1 (2.5)         | 0                 | 0                | 0                | 1 (0.5)       |
| Mild                                       | 0              | 1 (2.5)         | 0                 | 0                | 0                | 1 (0.5)       |
| Moderate                                   | 0              | 0               | 0                 | 0                | 0                | 0             |
| Severe                                     | 0              | 0               | 0                 | 0                | 0                | 0             |
| Pyrexia                                    | 1 (2.5)        | 1 (2.5)         | 1 (2.6)           | 0                | 0                | 3 (1.5)       |
| Mild                                       | 0              | 1 (2.5)         | 1 (2.6)           | 0                | 0                | 2 (1.0)       |
| Moderate                                   | 1 (2.5)        | 0               | 0                 | 0                | 0                | 1 (0.5)       |
| Severe                                     | 0              | 0               | 0                 | 0                | 0                | 0             |
| Swelling                                   | 0              | 0               | 0                 | 1 (2.5)          | 0                | 1 (0.5)       |
| Mild                                       | 0              | 0               | 0                 | 1 (2.5)          | 0                | 1 (0.5)       |
| Moderate                                   | 0              | 0               | 0                 | 0                | 0                | 0             |
| Severe                                     | 0              | 0               | 0                 | 0                | 0                | 0             |
| <b>Hepatobiliary disorders</b>             | 12 (30.0)      | 12 (30.0)       | 6 (15.4)          | 8 (20.0)         | 11 (27.5)        | 49 (24.6)     |
| Mild                                       | 4 (10.0)       | 9 (22.5)        | 4 (10.3)          | 4 (10.0)         | 7 (17.5)         | 28 (14.1)     |
| Moderate                                   | 4 (10.0)       | 2 (5.0)         | 1 (2.6)           | 4 (10.0)         | 3 (7.5)          | 14 (7.0)      |
| Severe                                     | 4 (10.0)       | 1 (2.5)         | 1 (2.6)           | 0                | 1 (2.5)          | 7 (3.5)       |
| Cholelithiasis                             | 1 (2.5)        | 0               | 0                 | 0                | 0                | 1 (0.5)       |
| Mild                                       | 1 (2.5)        | 0               | 0                 | 0                | 0                | 1 (0.5)       |
| Moderate                                   | 0              | 0               | 0                 | 0                | 0                | 0             |
| Severe                                     | 0              | 0               | 0                 | 0                | 0                | 0             |
| Drug-induced liver injury                  | 12 (30.0)      | 12 (30.0)       | 6 (15.4)          | 8 (20.0)         | 11 (27.5)        | 49 (24.6)     |
| Mild                                       | 4 (10.0)       | 9 (22.5)        | 4 (10.3)          | 4 (10.0)         | 7 (17.5)         | 28 (14.1)     |
| Moderate                                   | 4 (10.0)       | 2 (5.0)         | 1 (2.6)           | 4 (10.0)         | 3 (7.5)          | 14 (7.0)      |
| Severe                                     | 4 (10.0)       | 1 (2.5)         | 1 (2.6)           | 0                | 1 (2.5)          | 7 (3.5)       |
| <b>Immune system disorders</b>             | 0              | 2 (5.0)         | 0                 | 0                | 0                | 2 (1.0)       |

| System Organ Class Preferred Term Severity | Control (N=40) | CC-11050 (N=40) | Everolimus (N=39) | Auranofin (N=40) | Vitamin D (N=40) | Total (N=199) |
|--------------------------------------------|----------------|-----------------|-------------------|------------------|------------------|---------------|
| Mild                                       | 0              | 2 (5.0)         | 0                 | 0                | 0                | 2 (1.0)       |
| Moderate                                   | 0              | 0               | 0                 | 0                | 0                | 0             |
| Severe                                     | 0              | 0               | 0                 | 0                | 0                | 0             |
| Hypersensitivity                           | 0              | 2 (5.0)         | 0                 | 0                | 0                | 2 (1.0)       |
| Mild                                       | 0              | 2 (5.0)         | 0                 | 0                | 0                | 2 (1.0)       |
| Moderate                                   | 0              | 0               | 0                 | 0                | 0                | 0             |
| Severe                                     | 0              | 0               | 0                 | 0                | 0                | 0             |
| <b>Infections and infestations</b>         | 6 (15.0)       | 4 (10.0)        | 9 (23.1)          | 9 (22.5)         | 10 (25.0)        | 38 (19.1)     |
| Mild                                       | 3 (7.5)        | 1 (2.5)         | 1 (2.6)           | 1 (2.5)          | 3 (7.5)          | 9 (4.5)       |
| Moderate                                   | 3 (7.5)        | 3 (7.5)         | 8 (20.5)          | 6 (15.0)         | 6 (15.0)         | 26 (13.1)     |
| Severe                                     | 0              | 0               | 0                 | 2 (5.0)          | 1 (2.5)          | 3 (1.5)       |
| Abscess                                    | 0              | 0               | 1 (2.6)           | 0                | 0                | 1 (0.5)       |
| Mild                                       | 0              | 0               | 0                 | 0                | 0                | 0             |
| Moderate                                   | 0              | 0               | 1 (2.6)           | 0                | 0                | 1 (0.5)       |
| Severe                                     | 0              | 0               | 0                 | 0                | 0                | 0             |
| Acute hepatitis B                          | 0              | 0               | 0                 | 1 (2.5)          | 0                | 1 (0.5)       |
| Mild                                       | 0              | 0               | 0                 | 0                | 0                | 0             |
| Moderate                                   | 0              | 0               | 0                 | 1 (2.5)          | 0                | 1 (0.5)       |
| Severe                                     | 0              | 0               | 0                 | 0                | 0                | 0             |
| Body tinea                                 | 0              | 0               | 1 (2.6)           | 0                | 0                | 1 (0.5)       |
| Mild                                       | 0              | 0               | 0                 | 0                | 0                | 0             |
| Moderate                                   | 0              | 0               | 1 (2.6)           | 0                | 0                | 1 (0.5)       |
| Severe                                     | 0              | 0               | 0                 | 0                | 0                | 0             |
| Bone tuberculosis                          | 0              | 0               | 0                 | 0                | 1 (2.5)          | 1 (0.5)       |
| Mild                                       | 0              | 0               | 0                 | 0                | 0                | 0             |
| Moderate                                   | 0              | 0               | 0                 | 0                | 0                | 0             |
| Severe                                     | 0              | 0               | 0                 | 0                | 1 (2.5)          | 1 (0.5)       |
| Fungal infection                           | 0              | 0               | 0                 | 0                | 1 (2.5)          | 1 (0.5)       |
| Mild                                       | 0              | 0               | 0                 | 0                | 0                | 0             |
| Moderate                                   | 0              | 0               | 0                 | 0                | 1 (2.5)          | 1 (0.5)       |
| Severe                                     | 0              | 0               | 0                 | 0                | 0                | 0             |
| Fungal skin infection                      | 0              | 0               | 0                 | 0                | 1 (2.5)          | 1 (0.5)       |
| Mild                                       | 0              | 0               | 0                 | 0                | 1 (2.5)          | 1 (0.5)       |
| Moderate                                   | 0              | 0               | 0                 | 0                | 0                | 0             |
| Severe                                     | 0              | 0               | 0                 | 0                | 0                | 0             |
| Gastroenteritis                            | 0              | 0               | 2 (5.1)           | 3 (7.5)          | 1 (2.5)          | 6 (3.0)       |
| Mild                                       | 0              | 0               | 0                 | 0                | 1 (2.5)          | 1 (0.5)       |
| Moderate                                   | 0              | 0               | 2 (5.1)           | 2 (5.0)          | 0                | 4 (2.0)       |

| System Organ Class Preferred Term Severity | Control (N=40) | CC-11050 (N=40) | Everolimus (N=39) | Auranofin (N=40) | Vitamin D (N=40) | Total (N=199) |
|--------------------------------------------|----------------|-----------------|-------------------|------------------|------------------|---------------|
| Severe                                     | 0              | 0               | 0                 | 1 (2.5)          | 0                | 1 (0.5)       |
| Gingivitis                                 | 0              | 0               | 0                 | 1 (2.5)          | 0                | 1 (0.5)       |
| Mild                                       | 0              | 0               | 0                 | 0                | 0                | 0             |
| Moderate                                   | 0              | 0               | 0                 | 1 (2.5)          | 0                | 1 (0.5)       |
| Severe                                     | 0              | 0               | 0                 | 0                | 0                | 0             |
| Hepatitis B                                | 0              | 0               | 0                 | 1 (2.5)          | 0                | 1 (0.5)       |
| Mild                                       | 0              | 0               | 0                 | 0                | 0                | 0             |
| Moderate                                   | 0              | 0               | 0                 | 0                | 0                | 0             |
| Severe                                     | 0              | 0               | 0                 | 1 (2.5)          | 0                | 1 (0.5)       |
| Infection                                  | 0              | 0               | 0                 | 0                | 1 (2.5)          | 1 (0.5)       |
| Mild                                       | 0              | 0               | 0                 | 0                | 0                | 0             |
| Moderate                                   | 0              | 0               | 0                 | 0                | 1 (2.5)          | 1 (0.5)       |
| Severe                                     | 0              | 0               | 0                 | 0                | 0                | 0             |
| Lower respiratory tract infection          | 0              | 2 (5.0)         | 2 (5.1)           | 2 (5.0)          | 3 (7.5)          | 9 (4.5)       |
| Mild                                       | 0              | 0               | 0                 | 0                | 0                | 0             |
| Moderate                                   | 0              | 2 (5.0)         | 2 (5.1)           | 2 (5.0)          | 3 (7.5)          | 9 (4.5)       |
| Severe                                     | 0              | 0               | 0                 | 0                | 0                | 0             |
| Oral candidiasis                           | 0              | 0               | 0                 | 0                | 1 (2.5)          | 1 (0.5)       |
| Mild                                       | 0              | 0               | 0                 | 0                | 0                | 0             |
| Moderate                                   | 0              | 0               | 0                 | 0                | 1 (2.5)          | 1 (0.5)       |
| Severe                                     | 0              | 0               | 0                 | 0                | 0                | 0             |
| Otitis media                               | 0              | 0               | 1 (2.6)           | 0                | 0                | 1 (0.5)       |
| Mild                                       | 0              | 0               | 0                 | 0                | 0                | 0             |
| Moderate                                   | 0              | 0               | 1 (2.6)           | 0                | 0                | 1 (0.5)       |
| Severe                                     | 0              | 0               | 0                 | 0                | 0                | 0             |
| Rectal abscess                             | 1 (2.5)        | 0               | 0                 | 0                | 0                | 1 (0.5)       |
| Mild                                       | 0              | 0               | 0                 | 0                | 0                | 0             |
| Moderate                                   | 1 (2.5)        | 0               | 0                 | 0                | 0                | 1 (0.5)       |
| Severe                                     | 0              | 0               | 0                 | 0                | 0                | 0             |
| Respiratory tract infection                | 1 (2.5)        | 0               | 0                 | 0                | 0                | 1 (0.5)       |
| Mild                                       | 1 (2.5)        | 0               | 0                 | 0                | 0                | 1 (0.5)       |
| Moderate                                   | 0              | 0               | 0                 | 0                | 0                | 0             |
| Severe                                     | 0              | 0               | 0                 | 0                | 0                | 0             |
| Rhinitis                                   | 1 (2.5)        | 0               | 0                 | 0                | 0                | 1 (0.5)       |
| Mild                                       | 0              | 0               | 0                 | 0                | 0                | 0             |
| Moderate                                   | 1 (2.5)        | 0               | 0                 | 0                | 0                | 1 (0.5)       |
| Severe                                     | 0              | 0               | 0                 | 0                | 0                | 0             |

| System Organ Class Preferred Term Severity            | Control (N=40) | CC-11050 (N=40) | Everolimus (N=39) | Auranofin (N=40) | Vitamin D (N=40) | Total (N=199) |
|-------------------------------------------------------|----------------|-----------------|-------------------|------------------|------------------|---------------|
| Sepsis                                                | 0              | 0               | 0                 | 1 (2.5)          | 0                | 1 (0.5)       |
| Mild                                                  | 0              | 0               | 0                 | 0                | 0                | 0             |
| Moderate                                              | 0              | 0               | 0                 | 0                | 0                | 0             |
| Severe                                                | 0              | 0               | 0                 | 1 (2.5)          | 0                | 1 (0.5)       |
| Sexually transmitted disease                          | 1 (2.5)        | 0               | 0                 | 0                | 0                | 1 (0.5)       |
| Mild                                                  | 0              | 0               | 0                 | 0                | 0                | 0             |
| Moderate                                              | 1 (2.5)        | 0               | 0                 | 0                | 0                | 1 (0.5)       |
| Severe                                                | 0              | 0               | 0                 | 0                | 0                | 0             |
| Tinea manuum                                          | 0              | 0               | 1 (2.6)           | 0                | 0                | 1 (0.5)       |
| Mild                                                  | 0              | 0               | 1 (2.6)           | 0                | 0                | 1 (0.5)       |
| Moderate                                              | 0              | 0               | 0                 | 0                | 0                | 0             |
| Severe                                                | 0              | 0               | 0                 | 0                | 0                | 0             |
| Tinea pedis                                           | 0              | 0               | 1 (2.6)           | 0                | 0                | 1 (0.5)       |
| Mild                                                  | 0              | 0               | 1 (2.6)           | 0                | 0                | 1 (0.5)       |
| Moderate                                              | 0              | 0               | 0                 | 0                | 0                | 0             |
| Severe                                                | 0              | 0               | 0                 | 0                | 0                | 0             |
| Tonsillitis                                           | 0              | 0               | 1 (2.6)           | 0                | 0                | 1 (0.5)       |
| Mild                                                  | 0              | 0               | 1 (2.6)           | 0                | 0                | 1 (0.5)       |
| Moderate                                              | 0              | 0               | 0                 | 0                | 0                | 0             |
| Severe                                                | 0              | 0               | 0                 | 0                | 0                | 0             |
| Tooth abscess                                         | 0              | 0               | 1 (2.6)           | 0                | 0                | 1 (0.5)       |
| Mild                                                  | 0              | 0               | 0                 | 0                | 0                | 0             |
| Moderate                                              | 0              | 0               | 1 (2.6)           | 0                | 0                | 1 (0.5)       |
| Severe                                                | 0              | 0               | 0                 | 0                | 0                | 0             |
| Upper respiratory tract infection                     | 2 (5.0)        | 1 (2.5)         | 1 (2.6)           | 1 (2.5)          | 1 (2.5)          | 6 (3.0)       |
| Mild                                                  | 1 (2.5)        | 1 (2.5)         | 0                 | 1 (2.5)          | 1 (2.5)          | 4 (2.0)       |
| Moderate                                              | 1 (2.5)        | 0               | 1 (2.6)           | 0                | 0                | 2 (1.0)       |
| Severe                                                | 0              | 0               | 0                 | 0                | 0                | 0             |
| Urinary tract infection                               | 1 (2.5)        | 2 (5.0)         | 0                 | 1 (2.5)          | 2 (5.0)          | 6 (3.0)       |
| Mild                                                  | 1 (2.5)        | 0               | 0                 | 0                | 2 (5.0)          | 3 (1.5)       |
| Moderate                                              | 0              | 2 (5.0)         | 0                 | 1 (2.5)          | 0                | 3 (1.5)       |
| Severe                                                | 0              | 0               | 0                 | 0                | 0                | 0             |
| <b>Injury, poisoning and procedural complications</b> | 1 (2.5)        | 1 (2.5)         | 1 (2.6)           | 1 (2.5)          | 2 (5.0)          | 6 (3.0)       |
| Mild                                                  | 0              | 1 (2.5)         | 1 (2.6)           | 1 (2.5)          | 1 (2.5)          | 4 (2.0)       |
| Moderate                                              | 1 (2.5)        | 0               | 0                 | 0                | 1 (2.5)          | 2 (1.0)       |
| Severe                                                | 0              | 0               | 0                 | 0                | 0                | 0             |

| System Organ Class Preferred Term Severity | Control (N=40) | CC-11050 (N=40) | Everolimus (N=39) | Auranofin (N=40) | Vitamin D (N=40) | Total (N=199) |
|--------------------------------------------|----------------|-----------------|-------------------|------------------|------------------|---------------|
| Contusion                                  | 1 (2.5)        | 0               | 0                 | 0                | 0                | 1 (0.5)       |
| Mild                                       | 0              | 0               | 0                 | 0                | 0                | 0             |
| Moderate                                   | 1 (2.5)        | 0               | 0                 | 0                | 0                | 1 (0.5)       |
| Severe                                     | 0              | 0               | 0                 | 0                | 0                | 0             |
| Joint injury                               | 0              | 0               | 1 (2.6)           | 0                | 0                | 1 (0.5)       |
| Mild                                       | 0              | 0               | 1 (2.6)           | 0                | 0                | 1 (0.5)       |
| Moderate                                   | 0              | 0               | 0                 | 0                | 0                | 0             |
| Severe                                     | 0              | 0               | 0                 | 0                | 0                | 0             |
| Skin laceration                            | 0              | 0               | 0                 | 1 (2.5)          | 0                | 1 (0.5)       |
| Mild                                       | 0              | 0               | 0                 | 1 (2.5)          | 0                | 1 (0.5)       |
| Moderate                                   | 0              | 0               | 0                 | 0                | 0                | 0             |
| Severe                                     | 0              | 0               | 0                 | 0                | 0                | 0             |
| Soft tissue injury                         | 0              | 1 (2.5)         | 0                 | 0                | 1 (2.5)          | 2 (1.0)       |
| Mild                                       | 0              | 1 (2.5)         | 0                 | 0                | 0                | 1 (0.5)       |
| Moderate                                   | 0              | 0               | 0                 | 0                | 1 (2.5)          | 1 (0.5)       |
| Severe                                     | 0              | 0               | 0                 | 0                | 0                | 0             |
| Thermal burn                               | 0              | 0               | 0                 | 0                | 1 (2.5)          | 1 (0.5)       |
| Mild                                       | 0              | 0               | 0                 | 0                | 1 (2.5)          | 1 (0.5)       |
| Moderate                                   | 0              | 0               | 0                 | 0                | 0                | 0             |
| Severe                                     | 0              | 0               | 0                 | 0                | 0                | 0             |
| <b>Investigations</b>                      | 20 (50.0)      | 18 (45.0)       | 12 (30.8)         | 18 (45.0)        | 21 (52.5)        | 89 (44.7)     |
| Mild                                       | 11 (27.5)      | 11 (27.5)       | 8 (20.5)          | 11 (27.5)        | 15 (37.5)        | 56 (28.1)     |
| Moderate                                   | 6 (15.0)       | 5 (12.5)        | 3 (7.7)           | 6 (15.0)         | 5 (12.5)         | 25 (12.6)     |
| Severe                                     | 3 (7.5)        | 2 (5.0)         | 1 (2.6)           | 1 (2.5)          | 1 (2.5)          | 8 (4.0)       |
| Alanine aminotransferase increased         | 0              | 1 (2.5)         | 1 (2.6)           | 0                | 0                | 2 (1.0)       |
| Mild                                       | 0              | 0               | 0                 | 0                | 0                | 0             |
| Moderate                                   | 0              | 0               | 1 (2.6)           | 0                | 0                | 1 (0.5)       |
| Severe                                     | 0              | 1 (2.5)         | 0                 | 0                | 0                | 1 (0.5)       |
| Aspartate aminotransferase increased       | 10 (25.0)      | 11 (27.5)       | 6 (15.4)          | 8 (20.0)         | 11 (27.5)        | 46 (23.1)     |
| Mild                                       | 4 (10.0)       | 9 (22.5)        | 4 (10.3)          | 4 (10.0)         | 7 (17.5)         | 28 (14.1)     |
| Moderate                                   | 4 (10.0)       | 2 (5.0)         | 1 (2.6)           | 4 (10.0)         | 3 (7.5)          | 14 (7.0)      |
| Severe                                     | 2 (5.0)        | 0               | 1 (2.6)           | 0                | 1 (2.5)          | 4 (2.0)       |
| Blood alkaline phosphatase increased       | 4 (10.0)       | 4 (10.0)        | 0                 | 3 (7.5)          | 6 (15.0)         | 17 (8.5)      |
| Mild                                       | 3 (7.5)        | 3 (7.5)         | 0                 | 3 (7.5)          | 6 (15.0)         | 15 (7.5)      |
| Moderate                                   | 1 (2.5)        | 1 (2.5)         | 0                 | 0                | 0                | 2 (1.0)       |
| Severe                                     | 0              | 0               | 0                 | 0                | 0                | 0             |

| System Organ Class Preferred Term Severity | Control (N=40) | CC-11050 (N=40) | Everolimus (N=39) | Auranofin (N=40) | Vitamin D (N=40) | Total (N=199) |
|--------------------------------------------|----------------|-----------------|-------------------|------------------|------------------|---------------|
| Blood creatinine increased                 | 2 (5.0)        | 0               | 0                 | 0                | 0                | 2 (1.0)       |
| Mild                                       | 2 (5.0)        | 0               | 0                 | 0                | 0                | 2 (1.0)       |
| Moderate                                   | 0              | 0               | 0                 | 0                | 0                | 0             |
| Severe                                     | 0              | 0               | 0                 | 0                | 0                | 0             |
| Blood glucose decreased                    | 0              | 1 (2.5)         | 3 (7.7)           | 1 (2.5)          | 1 (2.5)          | 6 (3.0)       |
| Mild                                       | 0              | 1 (2.5)         | 3 (7.7)           | 1 (2.5)          | 1 (2.5)          | 6 (3.0)       |
| Moderate                                   | 0              | 0               | 0                 | 0                | 0                | 0             |
| Severe                                     | 0              | 0               | 0                 | 0                | 0                | 0             |
| Blood glucose increased                    | 0              | 0               | 0                 | 0                | 1 (2.5)          | 1 (0.5)       |
| Mild                                       | 0              | 0               | 0                 | 0                | 1 (2.5)          | 1 (0.5)       |
| Moderate                                   | 0              | 0               | 0                 | 0                | 0                | 0             |
| Severe                                     | 0              | 0               | 0                 | 0                | 0                | 0             |
| Blood potassium increased                  | 0              | 0               | 0                 | 1 (2.5)          | 0                | 1 (0.5)       |
| Mild                                       | 0              | 0               | 0                 | 1 (2.5)          | 0                | 1 (0.5)       |
| Moderate                                   | 0              | 0               | 0                 | 0                | 0                | 0             |
| Severe                                     | 0              | 0               | 0                 | 0                | 0                | 0             |
| Blood pressure increased                   | 4 (10.0)       | 0               | 3 (7.7)           | 3 (7.5)          | 1 (2.5)          | 11 (5.5)      |
| Mild                                       | 3 (7.5)        | 0               | 2 (5.1)           | 3 (7.5)          | 1 (2.5)          | 9 (4.5)       |
| Moderate                                   | 0              | 0               | 1 (2.6)           | 0                | 0                | 1 (0.5)       |
| Severe                                     | 1 (2.5)        | 0               | 0                 | 0                | 0                | 1 (0.5)       |
| Blood uric acid increased                  | 0              | 1 (2.5)         | 0                 | 0                | 0                | 1 (0.5)       |
| Mild                                       | 0              | 0               | 0                 | 0                | 0                | 0             |
| Moderate                                   | 0              | 0               | 0                 | 0                | 0                | 0             |
| Severe                                     | 0              | 1 (2.5)         | 0                 | 0                | 0                | 1 (0.5)       |
| Breath sounds abnormal                     | 0              | 0               | 0                 | 0                | 1 (2.5)          | 1 (0.5)       |
| Mild                                       | 0              | 0               | 0                 | 0                | 1 (2.5)          | 1 (0.5)       |
| Moderate                                   | 0              | 0               | 0                 | 0                | 0                | 0             |
| Severe                                     | 0              | 0               | 0                 | 0                | 0                | 0             |
| Electrocardiogram abnormal                 | 1 (2.5)        | 0               | 1 (2.6)           | 0                | 0                | 2 (1.0)       |
| Mild                                       | 1 (2.5)        | 0               | 0                 | 0                | 0                | 1 (0.5)       |
| Moderate                                   | 0              | 0               | 1 (2.6)           | 0                | 0                | 1 (0.5)       |
| Severe                                     | 0              | 0               | 0                 | 0                | 0                | 0             |
| Haemoglobin decreased                      | 2 (5.0)        | 3 (7.5)         | 1 (2.6)           | 1 (2.5)          | 0                | 7 (3.5)       |
| Mild                                       | 1 (2.5)        | 2 (5.0)         | 1 (2.6)           | 0                | 0                | 4 (2.0)       |
| Moderate                                   | 1 (2.5)        | 1 (2.5)         | 0                 | 1 (2.5)          | 0                | 3 (1.5)       |
| Severe                                     | 0              | 0               | 0                 | 0                | 0                | 0             |
| Heart rate increased                       | 1 (2.5)        | 1 (2.5)         | 0                 | 1 (2.5)          | 2 (5.0)          | 5 (2.5)       |

| System Organ Class Preferred Term Severity | Control (N=40) | CC-11050 (N=40) | Everolimus (N=39) | Auranofin (N=40) | Vitamin D (N=40) | Total (N=199) |
|--------------------------------------------|----------------|-----------------|-------------------|------------------|------------------|---------------|
| Mild                                       | 1 (2.5)        | 0               | 0                 | 1 (2.5)          | 2 (5.0)          | 4 (2.0)       |
| Moderate                                   | 0              | 1 (2.5)         | 0                 | 0                | 0                | 1 (0.5)       |
| Severe                                     | 0              | 0               | 0                 | 0                | 0                | 0             |
| Hepatic enzyme increased                   | 2 (5.0)        | 0               | 0                 | 0                | 0                | 2 (1.0)       |
| Mild                                       | 0              | 0               | 0                 | 0                | 0                | 0             |
| Moderate                                   | 1 (2.5)        | 0               | 0                 | 0                | 0                | 1 (0.5)       |
| Severe                                     | 1 (2.5)        | 0               | 0                 | 0                | 0                | 1 (0.5)       |
| Lymphocyte morphology abnormal             | 0              | 1 (2.5)         | 0                 | 0                | 0                | 1 (0.5)       |
| Mild                                       | 0              | 1 (2.5)         | 0                 | 0                | 0                | 1 (0.5)       |
| Moderate                                   | 0              | 0               | 0                 | 0                | 0                | 0             |
| Severe                                     | 0              | 0               | 0                 | 0                | 0                | 0             |
| Neutrophil count decreased                 | 0              | 0               | 1 (2.6)           | 1 (2.5)          | 1 (2.5)          | 3 (1.5)       |
| Mild                                       | 0              | 0               | 1 (2.6)           | 1 (2.5)          | 0                | 2 (1.0)       |
| Moderate                                   | 0              | 0               | 0                 | 0                | 1 (2.5)          | 1 (0.5)       |
| Severe                                     | 0              | 0               | 0                 | 0                | 0                | 0             |
| Oxygen saturation decreased                | 3 (7.5)        | 3 (7.5)         | 4 (10.3)          | 2 (5.0)          | 4 (10.0)         | 16 (8.0)      |
| Mild                                       | 3 (7.5)        | 3 (7.5)         | 4 (10.3)          | 2 (5.0)          | 4 (10.0)         | 16 (8.0)      |
| Moderate                                   | 0              | 0               | 0                 | 0                | 0                | 0             |
| Severe                                     | 0              | 0               | 0                 | 0                | 0                | 0             |
| Platelet count decreased                   | 0              | 0               | 0                 | 1 (2.5)          | 1 (2.5)          | 2 (1.0)       |
| Mild                                       | 0              | 0               | 0                 | 0                | 1 (2.5)          | 1 (0.5)       |
| Moderate                                   | 0              | 0               | 0                 | 1 (2.5)          | 0                | 1 (0.5)       |
| Severe                                     | 0              | 0               | 0                 | 0                | 0                | 0             |
| Platelet count increased                   | 0              | 0               | 0                 | 1 (2.5)          | 0                | 1 (0.5)       |
| Mild                                       | 0              | 0               | 0                 | 0                | 0                | 0             |
| Moderate                                   | 0              | 0               | 0                 | 1 (2.5)          | 0                | 1 (0.5)       |
| Severe                                     | 0              | 0               | 0                 | 0                | 0                | 0             |
| Transaminases abnormal                     | 0              | 0               | 0                 | 1 (2.5)          | 0                | 1 (0.5)       |
| Mild                                       | 0              | 0               | 0                 | 0                | 0                | 0             |
| Moderate                                   | 0              | 0               | 0                 | 0                | 0                | 0             |
| Severe                                     | 0              | 0               | 0                 | 1 (2.5)          | 0                | 1 (0.5)       |
| Urine analysis abnormal                    | 1 (2.5)        | 0               | 0                 | 0                | 0                | 1 (0.5)       |
| Mild                                       | 1 (2.5)        | 0               | 0                 | 0                | 0                | 1 (0.5)       |
| Moderate                                   | 0              | 0               | 0                 | 0                | 0                | 0             |
| Severe                                     | 0              | 0               | 0                 | 0                | 0                | 0             |
| Weight decreased                           | 1 (2.5)        | 0               | 0                 | 0                | 1 (2.5)          | 2 (1.0)       |

| System Organ Class Preferred Term Severity | Control (N=40) | CC-11050 (N=40) | Everolimus (N=39) | Auranofin (N=40) | Vitamin D (N=40) | Total (N=199) |
|--------------------------------------------|----------------|-----------------|-------------------|------------------|------------------|---------------|
| Mild                                       | 1 (2.5)        | 0               | 0                 | 0                | 0                | 1 (0.5)       |
| Moderate                                   | 0              | 0               | 0                 | 0                | 1 (2.5)          | 1 (0.5)       |
| Severe                                     | 0              | 0               | 0                 | 0                | 0                | 0             |
| <b>Metabolism and nutrition disorders</b>  | 3 (7.5)        | 9 (22.5)        | 4 (10.3)          | 7 (17.5)         | 5 (12.5)         | 28 (14.1)     |
| Mild                                       | 2 (5.0)        | 6 (15.0)        | 1 (2.6)           | 4 (10.0)         | 4 (10.0)         | 17 (8.5)      |
| Moderate                                   | 1 (2.5)        | 3 (7.5)         | 3 (7.7)           | 2 (5.0)          | 0                | 9 (4.5)       |
| Severe                                     | 0              | 0               | 0                 | 1 (2.5)          | 1 (2.5)          | 2 (1.0)       |
| Decreased appetite                         | 0              | 1 (2.5)         | 1 (2.6)           | 2 (5.0)          | 0                | 4 (2.0)       |
| Mild                                       | 0              | 1 (2.5)         | 0                 | 2 (5.0)          | 0                | 3 (1.5)       |
| Moderate                                   | 0              | 0               | 1 (2.6)           | 0                | 0                | 1 (0.5)       |
| Severe                                     | 0              | 0               | 0                 | 0                | 0                | 0             |
| Dehydration                                | 0              | 0               | 0                 | 1 (2.5)          | 0                | 1 (0.5)       |
| Mild                                       | 0              | 0               | 0                 | 0                | 0                | 0             |
| Moderate                                   | 0              | 0               | 0                 | 0                | 0                | 0             |
| Severe                                     | 0              | 0               | 0                 | 1 (2.5)          | 0                | 1 (0.5)       |
| Diabetes mellitus                          | 0              | 0               | 0                 | 1 (2.5)          | 0                | 1 (0.5)       |
| Mild                                       | 0              | 0               | 0                 | 0                | 0                | 0             |
| Moderate                                   | 0              | 0               | 0                 | 1 (2.5)          | 0                | 1 (0.5)       |
| Severe                                     | 0              | 0               | 0                 | 0                | 0                | 0             |
| Gout                                       | 0              | 1 (2.5)         | 0                 | 0                | 0                | 1 (0.5)       |
| Mild                                       | 0              | 1 (2.5)         | 0                 | 0                | 0                | 1 (0.5)       |
| Moderate                                   | 0              | 0               | 0                 | 0                | 0                | 0             |
| Severe                                     | 0              | 0               | 0                 | 0                | 0                | 0             |
| Hyperglycaemia                             | 0              | 1 (2.5)         | 0                 | 2 (5.0)          | 1 (2.5)          | 4 (2.0)       |
| Mild                                       | 0              | 0               | 0                 | 0                | 1 (2.5)          | 1 (0.5)       |
| Moderate                                   | 0              | 1 (2.5)         | 0                 | 2 (5.0)          | 0                | 3 (1.5)       |
| Severe                                     | 0              | 0               | 0                 | 0                | 0                | 0             |
| Hyperkalaemia                              | 0              | 0               | 0                 | 1 (2.5)          | 1 (2.5)          | 2 (1.0)       |
| Mild                                       | 0              | 0               | 0                 | 1 (2.5)          | 1 (2.5)          | 2 (1.0)       |
| Moderate                                   | 0              | 0               | 0                 | 0                | 0                | 0             |
| Severe                                     | 0              | 0               | 0                 | 0                | 0                | 0             |
| Hypoglycaemia                              | 1 (2.5)        | 5 (12.5)        | 2 (5.1)           | 2 (5.0)          | 1 (2.5)          | 11 (5.5)      |
| Mild                                       | 1 (2.5)        | 2 (5.0)         | 0                 | 2 (5.0)          | 0                | 5 (2.5)       |
| Moderate                                   | 0              | 3 (7.5)         | 2 (5.1)           | 0                | 0                | 5 (2.5)       |
| Severe                                     | 0              | 0               | 0                 | 0                | 1 (2.5)          | 1 (0.5)       |
| Hypokalaemia                               | 2 (5.0)        | 2 (5.0)         | 1 (2.6)           | 1 (2.5)          | 3 (7.5)          | 9 (4.5)       |
| Mild                                       | 1 (2.5)        | 2 (5.0)         | 1 (2.6)           | 1 (2.5)          | 3 (7.5)          | 8 (4.0)       |



| System Organ Class Preferred Term Severity             | Control (N=40) | CC-11050 (N=40) | Everolimus (N=39) | Auranofin (N=40) | Vitamin D (N=40) | Total (N=199) |
|--------------------------------------------------------|----------------|-----------------|-------------------|------------------|------------------|---------------|
| Moderate                                               | 1 (2.5)        | 0               | 0                 | 0                | 0                | 1 (0.5)       |
| Severe                                                 | 0              | 0               | 0                 | 0                | 0                | 0             |
| <b>Musculoskeletal and connective tissue disorders</b> | 11 (27.5)      | 15 (37.5)       | 8 (20.5)          | 11 (27.5)        | 15 (37.5)        | 60 (30.2)     |
| Mild                                                   | 5 (12.5)       | 8 (20.0)        | 4 (10.3)          | 4 (10.0)         | 11 (27.5)        | 32 (16.1)     |
| Moderate                                               | 6 (15.0)       | 7 (17.5)        | 4 (10.3)          | 7 (17.5)         | 4 (10.0)         | 28 (14.1)     |
| Severe                                                 | 0              | 0               | 0                 | 0                | 0                | 0             |
| Arthralgia                                             | 6 (15.0)       | 8 (20.0)        | 4 (10.3)          | 8 (20.0)         | 9 (22.5)         | 35 (17.6)     |
| Mild                                                   | 4 (10.0)       | 4 (10.0)        | 2 (5.1)           | 2 (5.0)          | 6 (15.0)         | 18 (9.0)      |
| Moderate                                               | 2 (5.0)        | 4 (10.0)        | 2 (5.1)           | 6 (15.0)         | 3 (7.5)          | 17 (8.5)      |
| Severe                                                 | 0              | 0               | 0                 | 0                | 0                | 0             |
| Arthritis reactive                                     | 0              | 1 (2.5)         | 1 (2.6)           | 0                | 0                | 2 (1.0)       |
| Mild                                                   | 0              | 0               | 0                 | 0                | 0                | 0             |
| Moderate                                               | 0              | 1 (2.5)         | 1 (2.6)           | 0                | 0                | 2 (1.0)       |
| Severe                                                 | 0              | 0               | 0                 | 0                | 0                | 0             |
| Back pain                                              | 4 (10.0)       | 1 (2.5)         | 1 (2.6)           | 4 (10.0)         | 8 (20.0)         | 18 (9.0)      |
| Mild                                                   | 2 (5.0)        | 1 (2.5)         | 1 (2.6)           | 2 (5.0)          | 6 (15.0)         | 12 (6.0)      |
| Moderate                                               | 2 (5.0)        | 0               | 0                 | 2 (5.0)          | 2 (5.0)          | 6 (3.0)       |
| Severe                                                 | 0              | 0               | 0                 | 0                | 0                | 0             |
| Bone pain                                              | 0              | 1 (2.5)         | 0                 | 0                | 0                | 1 (0.5)       |
| Mild                                                   | 0              | 0               | 0                 | 0                | 0                | 0             |
| Moderate                                               | 0              | 1 (2.5)         | 0                 | 0                | 0                | 1 (0.5)       |
| Severe                                                 | 0              | 0               | 0                 | 0                | 0                | 0             |
| Costochondritis                                        | 0              | 0               | 1 (2.6)           | 0                | 0                | 1 (0.5)       |
| Mild                                                   | 0              | 0               | 1 (2.6)           | 0                | 0                | 1 (0.5)       |
| Moderate                                               | 0              | 0               | 0                 | 0                | 0                | 0             |
| Severe                                                 | 0              | 0               | 0                 | 0                | 0                | 0             |
| Flank pain                                             | 0              | 1 (2.5)         | 1 (2.6)           | 0                | 0                | 2 (1.0)       |
| Mild                                                   | 0              | 1 (2.5)         | 0                 | 0                | 0                | 1 (0.5)       |
| Moderate                                               | 0              | 0               | 1 (2.6)           | 0                | 0                | 1 (0.5)       |
| Severe                                                 | 0              | 0               | 0                 | 0                | 0                | 0             |
| Joint swelling                                         | 1 (2.5)        | 2 (5.0)         | 0                 | 0                | 0                | 3 (1.5)       |
| Mild                                                   | 1 (2.5)        | 1 (2.5)         | 0                 | 0                | 0                | 2 (1.0)       |
| Moderate                                               | 0              | 1 (2.5)         | 0                 | 0                | 0                | 1 (0.5)       |
| Severe                                                 | 0              | 0               | 0                 | 0                | 0                | 0             |
| Muscle spasms                                          | 1 (2.5)        | 1 (2.5)         | 0                 | 0                | 1 (2.5)          | 3 (1.5)       |
| Mild                                                   | 0              | 0               | 0                 | 0                | 1 (2.5)          | 1 (0.5)       |
| Moderate                                               | 1 (2.5)        | 1 (2.5)         | 0                 | 0                | 0                | 2 (1.0)       |

| System Organ Class Preferred Term Severity | Control (N=40) | CC-11050 (N=40) | Everolimus (N=39) | Auranofin (N=40) | Vitamin D (N=40) | Total (N=199) |
|--------------------------------------------|----------------|-----------------|-------------------|------------------|------------------|---------------|
| Severe                                     | 0              | 0               | 0                 | 0                | 0                | 0             |
| Myalgia                                    | 0              | 2 (5.0)         | 0                 | 0                | 0                | 2 (1.0)       |
| Mild                                       | 0              | 2 (5.0)         | 0                 | 0                | 0                | 2 (1.0)       |
| Moderate                                   | 0              | 0               | 0                 | 0                | 0                | 0             |
| Severe                                     | 0              | 0               | 0                 | 0                | 0                | 0             |
| Neck pain                                  | 0              | 0               | 0                 | 0                | 1 (2.5)          | 1 (0.5)       |
| Mild                                       | 0              | 0               | 0                 | 0                | 1 (2.5)          | 1 (0.5)       |
| Moderate                                   | 0              | 0               | 0                 | 0                | 0                | 0             |
| Severe                                     | 0              | 0               | 0                 | 0                | 0                | 0             |
| Osteoarthritis                             | 0              | 0               | 0                 | 1 (2.5)          | 0                | 1 (0.5)       |
| Mild                                       | 0              | 0               | 0                 | 0                | 0                | 0             |
| Moderate                                   | 0              | 0               | 0                 | 1 (2.5)          | 0                | 1 (0.5)       |
| Severe                                     | 0              | 0               | 0                 | 0                | 0                | 0             |
| Pain in extremity                          | 1 (2.5)        | 2 (5.0)         | 1 (2.6)           | 2 (5.0)          | 0                | 6 (3.0)       |
| Mild                                       | 0              | 2 (5.0)         | 1 (2.6)           | 1 (2.5)          | 0                | 4 (2.0)       |
| Moderate                                   | 1 (2.5)        | 0               | 0                 | 1 (2.5)          | 0                | 2 (1.0)       |
| Severe                                     | 0              | 0               | 0                 | 0                | 0                | 0             |
| Pain in jaw                                | 0              | 1 (2.5)         | 0                 | 0                | 0                | 1 (0.5)       |
| Mild                                       | 0              | 1 (2.5)         | 0                 | 0                | 0                | 1 (0.5)       |
| Moderate                                   | 0              | 0               | 0                 | 0                | 0                | 0             |
| Severe                                     | 0              | 0               | 0                 | 0                | 0                | 0             |
| <b>Nervous system disorders</b>            | 2 (5.0)        | 8 (20.0)        | 0                 | 3 (7.5)          | 6 (15.0)         | 19 (9.5)      |
| Mild                                       | 2 (5.0)        | 5 (12.5)        | 0                 | 1 (2.5)          | 4 (10.0)         | 12 (6.0)      |
| Moderate                                   | 0              | 3 (7.5)         | 0                 | 1 (2.5)          | 2 (5.0)          | 6 (3.0)       |
| Severe                                     | 0              | 0               | 0                 | 1 (2.5)          | 0                | 1 (0.5)       |
| Dizziness                                  | 0              | 0               | 0                 | 1 (2.5)          | 0                | 1 (0.5)       |
| Mild                                       | 0              | 0               | 0                 | 0                | 0                | 0             |
| Moderate                                   | 0              | 0               | 0                 | 1 (2.5)          | 0                | 1 (0.5)       |
| Severe                                     | 0              | 0               | 0                 | 0                | 0                | 0             |
| Headache                                   | 2 (5.0)        | 3 (7.5)         | 0                 | 0                | 1 (2.5)          | 6 (3.0)       |
| Mild                                       | 2 (5.0)        | 2 (5.0)         | 0                 | 0                | 0                | 4 (2.0)       |
| Moderate                                   | 0              | 1 (2.5)         | 0                 | 0                | 1 (2.5)          | 2 (1.0)       |
| Severe                                     | 0              | 0               | 0                 | 0                | 0                | 0             |
| Neuropathy peripheral                      | 0              | 5 (12.5)        | 0                 | 2 (5.0)          | 5 (12.5)         | 12 (6.0)      |
| Mild                                       | 0              | 3 (7.5)         | 0                 | 1 (2.5)          | 4 (10.0)         | 8 (4.0)       |
| Moderate                                   | 0              | 2 (5.0)         | 0                 | 1 (2.5)          | 1 (2.5)          | 4 (2.0)       |
| Severe                                     | 0              | 0               | 0                 | 0                | 0                | 0             |
| Syncope                                    | 0              | 0               | 0                 | 1 (2.5)          | 0                | 1 (0.5)       |

| System Organ Class Preferred Term Severity      | Control (N=40) | CC-11050 (N=40) | Everolimus (N=39) | Auranofin (N=40) | Vitamin D (N=40) | Total (N=199) |
|-------------------------------------------------|----------------|-----------------|-------------------|------------------|------------------|---------------|
| Mild                                            | 0              | 0               | 0                 | 0                | 0                | 0             |
| Moderate                                        | 0              | 0               | 0                 | 0                | 0                | 0             |
| Severe                                          | 0              | 0               | 0                 | 1 (2.5)          | 0                | 1 (0.5)       |
| <b>Psychiatric disorders</b>                    | 1 (2.5)        | 0               | 2 (5.1)           | 2 (5.0)          | 0                | 5 (2.5)       |
| Mild                                            | 0              | 0               | 1 (2.6)           | 2 (5.0)          | 0                | 3 (1.5)       |
| Moderate                                        | 1 (2.5)        | 0               | 1 (2.6)           | 0                | 0                | 2 (1.0)       |
| Severe                                          | 0              | 0               | 0                 | 0                | 0                | 0             |
| Insomnia                                        | 1 (2.5)        | 0               | 1 (2.6)           | 2 (5.0)          | 0                | 4 (2.0)       |
| Mild                                            | 0              | 0               | 1 (2.6)           | 2 (5.0)          | 0                | 3 (1.5)       |
| Moderate                                        | 1 (2.5)        | 0               | 0                 | 0                | 0                | 1 (0.5)       |
| Severe                                          | 0              | 0               | 0                 | 0                | 0                | 0             |
| Psychotic disorder                              | 0              | 0               | 1 (2.6)           | 0                | 0                | 1 (0.5)       |
| Mild                                            | 0              | 0               | 0                 | 0                | 0                | 0             |
| Moderate                                        | 0              | 0               | 1 (2.6)           | 0                | 0                | 1 (0.5)       |
| Severe                                          | 0              | 0               | 0                 | 0                | 0                | 0             |
| <b>Renal and urinary disorders</b>              | 0              | 0               | 1 (2.6)           | 1 (2.5)          | 1 (2.5)          | 3 (1.5)       |
| Mild                                            | 0              | 0               | 0                 | 1 (2.5)          | 1 (2.5)          | 2 (1.0)       |
| Moderate                                        | 0              | 0               | 1 (2.6)           | 0                | 0                | 1 (0.5)       |
| Severe                                          | 0              | 0               | 0                 | 0                | 0                | 0             |
| Dysuria                                         | 0              | 0               | 1 (2.6)           | 1 (2.5)          | 0                | 2 (1.0)       |
| Mild                                            | 0              | 0               | 0                 | 1 (2.5)          | 0                | 1 (0.5)       |
| Moderate                                        | 0              | 0               | 1 (2.6)           | 0                | 0                | 1 (0.5)       |
| Severe                                          | 0              | 0               | 0                 | 0                | 0                | 0             |
| Micturition urgency                             | 0              | 0               | 0                 | 0                | 1 (2.5)          | 1 (0.5)       |
| Mild                                            | 0              | 0               | 0                 | 0                | 1 (2.5)          | 1 (0.5)       |
| Moderate                                        | 0              | 0               | 0                 | 0                | 0                | 0             |
| Severe                                          | 0              | 0               | 0                 | 0                | 0                | 0             |
| <b>Reproductive system and breast disorders</b> | 2 (5.0)        | 3 (7.5)         | 1 (2.6)           | 1 (2.5)          | 3 (7.5)          | 10 (5.0)      |
| Mild                                            | 2 (5.0)        | 2 (5.0)         | 1 (2.6)           | 0                | 1 (2.5)          | 6 (3.0)       |
| Moderate                                        | 0              | 1 (2.5)         | 0                 | 1 (2.5)          | 2 (5.0)          | 4 (2.0)       |
| Severe                                          | 0              | 0               | 0                 | 0                | 0                | 0             |
| Dysfunctional uterine bleeding                  | 0              | 0               | 0                 | 0                | 1 (2.5)          | 1 (0.5)       |
| Mild                                            | 0              | 0               | 0                 | 0                | 0                | 0             |
| Moderate                                        | 0              | 0               | 0                 | 0                | 1 (2.5)          | 1 (0.5)       |
| Severe                                          | 0              | 0               | 0                 | 0                | 0                | 0             |
| Gynaecomastia                                   | 0              | 0               | 0                 | 0                | 1 (2.5)          | 1 (0.5)       |
| Mild                                            | 0              | 0               | 0                 | 0                | 0                | 0             |

| System Organ Class Preferred Term Severity             | Control (N=40) | CC-11050 (N=40) | Everolimus (N=39) | Auranofin (N=40) | Vitamin D (N=40) | Total (N=199) |
|--------------------------------------------------------|----------------|-----------------|-------------------|------------------|------------------|---------------|
| Moderate                                               | 0              | 0               | 0                 | 0                | 1 (2.5)          | 1 (0.5)       |
| Severe                                                 | 0              | 0               | 0                 | 0                | 0                | 0             |
| Menorrhagia                                            | 0              | 1 (2.5)         | 0                 | 0                | 0                | 1 (0.5)       |
| Mild                                                   | 0              | 1 (2.5)         | 0                 | 0                | 0                | 1 (0.5)       |
| Moderate                                               | 0              | 0               | 0                 | 0                | 0                | 0             |
| Severe                                                 | 0              | 0               | 0                 | 0                | 0                | 0             |
| Metrorrhagia                                           | 0              | 1 (2.5)         | 0                 | 0                | 0                | 1 (0.5)       |
| Mild                                                   | 0              | 1 (2.5)         | 0                 | 0                | 0                | 1 (0.5)       |
| Moderate                                               | 0              | 0               | 0                 | 0                | 0                | 0             |
| Severe                                                 | 0              | 0               | 0                 | 0                | 0                | 0             |
| Pelvic fluid collection                                | 0              | 0               | 1 (2.6)           | 0                | 0                | 1 (0.5)       |
| Mild                                                   | 0              | 0               | 1 (2.6)           | 0                | 0                | 1 (0.5)       |
| Moderate                                               | 0              | 0               | 0                 | 0                | 0                | 0             |
| Severe                                                 | 0              | 0               | 0                 | 0                | 0                | 0             |
| Prostatic calcification                                | 1 (2.5)        | 0               | 0                 | 0                | 0                | 1 (0.5)       |
| Mild                                                   | 1 (2.5)        | 0               | 0                 | 0                | 0                | 1 (0.5)       |
| Moderate                                               | 0              | 0               | 0                 | 0                | 0                | 0             |
| Severe                                                 | 0              | 0               | 0                 | 0                | 0                | 0             |
| Scrotal mass                                           | 0              | 0               | 0                 | 1 (2.5)          | 0                | 1 (0.5)       |
| Mild                                                   | 0              | 0               | 0                 | 0                | 0                | 0             |
| Moderate                                               | 0              | 0               | 0                 | 1 (2.5)          | 0                | 1 (0.5)       |
| Severe                                                 | 0              | 0               | 0                 | 0                | 0                | 0             |
| Vaginal discharge                                      | 0              | 1 (2.5)         | 0                 | 0                | 0                | 1 (0.5)       |
| Mild                                                   | 0              | 0               | 0                 | 0                | 0                | 0             |
| Moderate                                               | 0              | 1 (2.5)         | 0                 | 0                | 0                | 1 (0.5)       |
| Severe                                                 | 0              | 0               | 0                 | 0                | 0                | 0             |
| Vaginal haemorrhage                                    | 1 (2.5)        | 1 (2.5)         | 0                 | 0                | 1 (2.5)          | 3 (1.5)       |
| Mild                                                   | 1 (2.5)        | 1 (2.5)         | 0                 | 0                | 1 (2.5)          | 3 (1.5)       |
| Moderate                                               | 0              | 0               | 0                 | 0                | 0                | 0             |
| Severe                                                 | 0              | 0               | 0                 | 0                | 0                | 0             |
| <b>Respiratory, thoracic and mediastinal disorders</b> | 12 (30.0)      | 8 (20.0)        | 8 (20.5)          | 10 (25.0)        | 10 (25.0)        | 48 (24.1)     |
| Mild                                                   | 9 (22.5)       | 8 (20.0)        | 7 (17.9)          | 7 (17.5)         | 8 (20.0)         | 39 (19.6)     |
| Moderate                                               | 3 (7.5)        | 0               | 1 (2.6)           | 2 (5.0)          | 2 (5.0)          | 8 (4.0)       |
| Severe                                                 | 0              | 0               | 0                 | 1 (2.5)          | 0                | 1 (0.5)       |
| Chest pain                                             | 10 (25.0)      | 3 (7.5)         | 2 (5.1)           | 4 (10.0)         | 6 (15.0)         | 25 (12.6)     |
| Mild                                                   | 7 (17.5)       | 3 (7.5)         | 2 (5.1)           | 3 (7.5)          | 4 (10.0)         | 19 (9.5)      |
| Moderate                                               | 3 (7.5)        | 0               | 0                 | 1 (2.5)          | 2 (5.0)          | 6 (3.0)       |

| System Organ Class Preferred Term Severity | Control (N=40) | CC-11050 (N=40) | Everolimus (N=39) | Auranofin (N=40) | Vitamin D (N=40) | Total (N=199) |
|--------------------------------------------|----------------|-----------------|-------------------|------------------|------------------|---------------|
| Severe                                     | 0              | 0               | 0                 | 0                | 0                | 0             |
| Cough                                      | 2 (5.0)        | 0               | 2 (5.1)           | 2 (5.0)          | 1 (2.5)          | 7 (3.5)       |
| Mild                                       | 2 (5.0)        | 0               | 1 (2.6)           | 1 (2.5)          | 1 (2.5)          | 5 (2.5)       |
| Moderate                                   | 0              | 0               | 1 (2.6)           | 1 (2.5)          | 0                | 2 (1.0)       |
| Severe                                     | 0              | 0               | 0                 | 0                | 0                | 0             |
| Dyspnoea                                   | 0              | 1 (2.5)         | 0                 | 1 (2.5)          | 0                | 2 (1.0)       |
| Mild                                       | 0              | 1 (2.5)         | 0                 | 0                | 0                | 1 (0.5)       |
| Moderate                                   | 0              | 0               | 0                 | 1 (2.5)          | 0                | 1 (0.5)       |
| Severe                                     | 0              | 0               | 0                 | 0                | 0                | 0             |
| Epistaxis                                  | 0              | 0               | 0                 | 1 (2.5)          | 1 (2.5)          | 2 (1.0)       |
| Mild                                       | 0              | 0               | 0                 | 1 (2.5)          | 1 (2.5)          | 2 (1.0)       |
| Moderate                                   | 0              | 0               | 0                 | 0                | 0                | 0             |
| Severe                                     | 0              | 0               | 0                 | 0                | 0                | 0             |
| Haemoptysis                                | 2 (5.0)        | 1 (2.5)         | 1 (2.6)           | 1 (2.5)          | 3 (7.5)          | 8 (4.0)       |
| Mild                                       | 2 (5.0)        | 1 (2.5)         | 1 (2.6)           | 1 (2.5)          | 3 (7.5)          | 8 (4.0)       |
| Moderate                                   | 0              | 0               | 0                 | 0                | 0                | 0             |
| Severe                                     | 0              | 0               | 0                 | 0                | 0                | 0             |
| Nasal congestion                           | 0              | 1 (2.5)         | 0                 | 1 (2.5)          | 0                | 2 (1.0)       |
| Mild                                       | 0              | 1 (2.5)         | 0                 | 1 (2.5)          | 0                | 2 (1.0)       |
| Moderate                                   | 0              | 0               | 0                 | 0                | 0                | 0             |
| Severe                                     | 0              | 0               | 0                 | 0                | 0                | 0             |
| Productive cough                           | 0              | 0               | 0                 | 1 (2.5)          | 0                | 1 (0.5)       |
| Mild                                       | 0              | 0               | 0                 | 1 (2.5)          | 0                | 1 (0.5)       |
| Moderate                                   | 0              | 0               | 0                 | 0                | 0                | 0             |
| Severe                                     | 0              | 0               | 0                 | 0                | 0                | 0             |
| Rales                                      | 1 (2.5)        | 1 (2.5)         | 2 (5.1)           | 0                | 0                | 4 (2.0)       |
| Mild                                       | 1 (2.5)        | 1 (2.5)         | 2 (5.1)           | 0                | 0                | 4 (2.0)       |
| Moderate                                   | 0              | 0               | 0                 | 0                | 0                | 0             |
| Severe                                     | 0              | 0               | 0                 | 0                | 0                | 0             |
| Respiration abnormal                       | 0              | 1 (2.5)         | 0                 | 0                | 0                | 1 (0.5)       |
| Mild                                       | 0              | 1 (2.5)         | 0                 | 0                | 0                | 1 (0.5)       |
| Moderate                                   | 0              | 0               | 0                 | 0                | 0                | 0             |
| Severe                                     | 0              | 0               | 0                 | 0                | 0                | 0             |
| Respiratory failure                        | 0              | 0               | 0                 | 1 (2.5)          | 0                | 1 (0.5)       |
| Mild                                       | 0              | 0               | 0                 | 0                | 0                | 0             |
| Moderate                                   | 0              | 0               | 0                 | 0                | 0                | 0             |
| Severe                                     | 0              | 0               | 0                 | 1 (2.5)          | 0                | 1 (0.5)       |
| Rhinorrhoea                                | 2 (5.0)        | 3 (7.5)         | 1 (2.6)           | 1 (2.5)          | 1 (2.5)          | 8 (4.0)       |

| System Organ Class Preferred Term Severity    | Control (N=40) | CC-11050 (N=40) | Everolimus (N=39) | Auranofin (N=40) | Vitamin D (N=40) | Total (N=199) |
|-----------------------------------------------|----------------|-----------------|-------------------|------------------|------------------|---------------|
| Mild                                          | 2 (5.0)        | 3 (7.5)         | 1 (2.6)           | 1 (2.5)          | 1 (2.5)          | 8 (4.0)       |
| Moderate                                      | 0              | 0               | 0                 | 0                | 0                | 0             |
| Severe                                        | 0              | 0               | 0                 | 0                | 0                | 0             |
| Tachypnoea                                    | 0              | 0               | 1 (2.6)           | 0                | 1 (2.5)          | 2 (1.0)       |
| Mild                                          | 0              | 0               | 1 (2.6)           | 0                | 1 (2.5)          | 2 (1.0)       |
| Moderate                                      | 0              | 0               | 0                 | 0                | 0                | 0             |
| Severe                                        | 0              | 0               | 0                 | 0                | 0                | 0             |
| Wheezing                                      | 3 (7.5)        | 1 (2.5)         | 0                 | 1 (2.5)          | 1 (2.5)          | 6 (3.0)       |
| Mild                                          | 3 (7.5)        | 1 (2.5)         | 0                 | 1 (2.5)          | 1 (2.5)          | 6 (3.0)       |
| Moderate                                      | 0              | 0               | 0                 | 0                | 0                | 0             |
| Severe                                        | 0              | 0               | 0                 | 0                | 0                | 0             |
| <b>Skin and subcutaneous tissue disorders</b> | 6 (15.0)       | 7 (17.5)        | 9 (23.1)          | 6 (15.0)         | 7 (17.5)         | 35 (17.6)     |
| Mild                                          | 4 (10.0)       | 5 (12.5)        | 7 (17.9)          | 5 (12.5)         | 6 (15.0)         | 27 (13.6)     |
| Moderate                                      | 2 (5.0)        | 2 (5.0)         | 2 (5.1)           | 1 (2.5)          | 1 (2.5)          | 8 (4.0)       |
| Severe                                        | 0              | 0               | 0                 | 0                | 0                | 0             |
| Acne                                          | 0              | 1 (2.5)         | 1 (2.6)           | 0                | 1 (2.5)          | 3 (1.5)       |
| Mild                                          | 0              | 1 (2.5)         | 1 (2.6)           | 0                | 1 (2.5)          | 3 (1.5)       |
| Moderate                                      | 0              | 0               | 0                 | 0                | 0                | 0             |
| Severe                                        | 0              | 0               | 0                 | 0                | 0                | 0             |
| Dry skin                                      | 0              | 0               | 1 (2.6)           | 0                | 0                | 1 (0.5)       |
| Mild                                          | 0              | 0               | 1 (2.6)           | 0                | 0                | 1 (0.5)       |
| Moderate                                      | 0              | 0               | 0                 | 0                | 0                | 0             |
| Severe                                        | 0              | 0               | 0                 | 0                | 0                | 0             |
| Eczema                                        | 0              | 1 (2.5)         | 0                 | 0                | 0                | 1 (0.5)       |
| Mild                                          | 0              | 0               | 0                 | 0                | 0                | 0             |
| Moderate                                      | 0              | 1 (2.5)         | 0                 | 0                | 0                | 1 (0.5)       |
| Severe                                        | 0              | 0               | 0                 | 0                | 0                | 0             |
| Night sweats                                  | 1 (2.5)        | 1 (2.5)         | 1 (2.6)           | 1 (2.5)          | 0                | 4 (2.0)       |
| Mild                                          | 1 (2.5)        | 1 (2.5)         | 1 (2.6)           | 1 (2.5)          | 0                | 4 (2.0)       |
| Moderate                                      | 0              | 0               | 0                 | 0                | 0                | 0             |
| Severe                                        | 0              | 0               | 0                 | 0                | 0                | 0             |
| Pruritus                                      | 3 (7.5)        | 0               | 4 (10.3)          | 4 (10.0)         | 4 (10.0)         | 15 (7.5)      |
| Mild                                          | 2 (5.0)        | 0               | 3 (7.7)           | 3 (7.5)          | 4 (10.0)         | 12 (6.0)      |
| Moderate                                      | 1 (2.5)        | 0               | 1 (2.6)           | 1 (2.5)          | 0                | 3 (1.5)       |
| Severe                                        | 0              | 0               | 0                 | 0                | 0                | 0             |
| Rash                                          | 2 (5.0)        | 5 (12.5)        | 3 (7.7)           | 1 (2.5)          | 3 (7.5)          | 14 (7.0)      |
| Mild                                          | 1 (2.5)        | 4 (10.0)        | 2 (5.1)           | 1 (2.5)          | 2 (5.0)          | 10 (5.0)      |

| System Organ Class Preferred Term Severity | Control (N=40) | CC-11050 (N=40) | Everolimus (N=39) | Auranofin (N=40) | Vitamin D (N=40) | Total (N=199) |
|--------------------------------------------|----------------|-----------------|-------------------|------------------|------------------|---------------|
| Moderate                                   | 1 (2.5)        | 1 (2.5)         | 1 (2.6)           | 0                | 1 (2.5)          | 4 (2.0)       |
| Severe                                     | 0              | 0               | 0                 | 0                | 0                | 0             |
| <b>Social circumstances</b>                | 0              | 1 (2.5)         | 0                 | 0                | 1 (2.5)          | 2 (1.0)       |
| Mild                                       | 0              | 1 (2.5)         | 0                 | 0                | 0                | 1 (0.5)       |
| Moderate                                   | 0              | 0               | 0                 | 0                | 1 (2.5)          | 1 (0.5)       |
| Severe                                     | 0              | 0               | 0                 | 0                | 0                | 0             |
| Physical assault                           | 0              | 1 (2.5)         | 0                 | 0                | 1 (2.5)          | 2 (1.0)       |
| Mild                                       | 0              | 1 (2.5)         | 0                 | 0                | 0                | 1 (0.5)       |
| Moderate                                   | 0              | 0               | 0                 | 0                | 1 (2.5)          | 1 (0.5)       |
| Severe                                     | 0              | 0               | 0                 | 0                | 0                | 0             |
| <b>Surgical and medical procedures</b>     | 0              | 0               | 0                 | 1 (2.5)          | 0                | 1 (0.5)       |
| Mild                                       | 0              | 0               | 0                 | 0                | 0                | 0             |
| Moderate                                   | 0              | 0               | 0                 | 1 (2.5)          | 0                | 1 (0.5)       |
| Severe                                     | 0              | 0               | 0                 | 0                | 0                | 0             |
| Hospitalisation                            | 0              | 0               | 0                 | 1 (2.5)          | 0                | 1 (0.5)       |
| Mild                                       | 0              | 0               | 0                 | 0                | 0                | 0             |
| Moderate                                   | 0              | 0               | 0                 | 1 (2.5)          | 0                | 1 (0.5)       |
| Severe                                     | 0              | 0               | 0                 | 0                | 0                | 0             |
| <b>Vascular disorders</b>                  | 2 (5.0)        | 2 (5.0)         | 2 (5.1)           | 5 (12.5)         | 2 (5.0)          | 13 (6.5)      |
| Mild                                       | 1 (2.5)        | 2 (5.0)         | 2 (5.1)           | 3 (7.5)          | 1 (2.5)          | 9 (4.5)       |
| Moderate                                   | 1 (2.5)        | 0               | 0                 | 1 (2.5)          | 1 (2.5)          | 3 (1.5)       |
| Severe                                     | 0              | 0               | 0                 | 1 (2.5)          | 0                | 1 (0.5)       |
| Hot flush                                  | 0              | 1 (2.5)         | 0                 | 0                | 0                | 1 (0.5)       |
| Mild                                       | 0              | 1 (2.5)         | 0                 | 0                | 0                | 1 (0.5)       |
| Moderate                                   | 0              | 0               | 0                 | 0                | 0                | 0             |
| Severe                                     | 0              | 0               | 0                 | 0                | 0                | 0             |
| Hypertension                               | 2 (5.0)        | 1 (2.5)         | 2 (5.1)           | 4 (10.0)         | 2 (5.0)          | 11 (5.5)      |
| Mild                                       | 1 (2.5)        | 1 (2.5)         | 2 (5.1)           | 2 (5.0)          | 1 (2.5)          | 7 (3.5)       |
| Moderate                                   | 1 (2.5)        | 0               | 0                 | 1 (2.5)          | 1 (2.5)          | 3 (1.5)       |
| Severe                                     | 0              | 0               | 0                 | 1 (2.5)          | 0                | 1 (0.5)       |
| Hypotension                                | 0              | 0               | 0                 | 1 (2.5)          | 0                | 1 (0.5)       |
| Mild                                       | 0              | 0               | 0                 | 1 (2.5)          | 0                | 1 (0.5)       |
| Moderate                                   | 0              | 0               | 0                 | 0                | 0                | 0             |
| Severe                                     | 0              | 0               | 0                 | 0                | 0                | 0             |

**Table S2.** Hazard ratio (HR) for stable culture conversion in the mITT population relative to control.

| Treatment arm  | Unadjusted |           |      | Adjusted <sup>a</sup> |           |      |
|----------------|------------|-----------|------|-----------------------|-----------|------|
|                | HR         | 95% CI    | P    | HR                    | 95% CI    | P    |
| CC-11050       | 1.34       | 0.86;2.10 | 0.20 | 1.32                  | 0.84;2.07 | 0.23 |
| Everolimus     | 1.22       | 0.78;1.92 | 0.39 | 1.32                  | 0.83;2.08 | 0.24 |
| Auranofin      | 1.12       | 0.71;1.75 | 0.63 | 1.17                  | 0.74;1.84 | 0.50 |
| Ergocalciferol | 1.07       | 0.69;1.66 | 0.77 | 1.00                  | 0.65;1.57 | 0.97 |

Stable culture conversion was determined using both liquid and solid cultures. <sup>a</sup>Analysis was adjusted for differences at baseline in MGIT TTP.



**Table S3.** Hazard ratio (HR) for stable culture conversion in the PP population relative to control, using liquid cultures only.

| Treatment arm  | Unadjusted |            |      | Adjusted <sup>a</sup> |            |      |
|----------------|------------|------------|------|-----------------------|------------|------|
|                | HR         | 95% CI     | P    | HR                    | 95% CI     | P    |
| CC-11050       | 1.10       | 0.70; 1.73 | 0.68 | 0.94                  | 0.60; 1.49 | 0.80 |
| Everolimus     | 1.13       | 0.71; 1.78 | 0.62 | 1.13                  | 0.71; 1.79 | 0.60 |
| Auranofin      | 1.21       | 0.77; 1.91 | 0.41 | 1.28                  | 0.81; 2.01 | 0.30 |
| Ergocalciferol | 0.96       | 0.61; 1.50 | 0.84 | 0.90                  | 0.57; 1.42 | 0.67 |

PP=per protocol; CI=confidence interval. <sup>a</sup>HR was adjusted for differences in MGIT TTP at baseline.

**Table S4.** Spirometry outcomes in the mITT population.

| Treatment<br>Arm | At 2 months |            |      |                       |            |      | At 6 months |            |      |                       |            |      |
|------------------|-------------|------------|------|-----------------------|------------|------|-------------|------------|------|-----------------------|------------|------|
|                  | Unadjusted  |            |      | Adjusted <sup>a</sup> |            |      | Unadjusted  |            |      | Adjusted <sup>a</sup> |            |      |
| FEV1 (%)         | Mean        | 95% CI     | P    | Mean                  | 95% CI     | P    | Mean        | 95% CI     | P    | Mean                  | 95% CI     | P    |
| CC-11050         | 3.54        | -5.57;12.7 | 0.44 | 1.63                  | -5.20;8.46 | 0.64 | 8.40        | -0.22;17.0 | 0.06 | 6.30                  | 0.09;12.5  | 0.05 |
| Everolimus       | 4.81        | -4.43;14.1 | 0.31 | -0.13                 | -7.06;6.80 | 0.97 | 11.1        | 2.40;19.9  | 0.01 | 6.34                  | 0.04;12.6  | 0.05 |
| Auranofin        | -5.72       | -14.8;3.33 | 0.21 | -5.06                 | -11.8;1.68 | 0.14 | -3.70       | -12.4;4.98 | 0.40 | -2.79                 | -9.00;3.42 | 0.38 |
| Ergocalciferol   | -0.49       | -9.54;8.56 | 0.92 | -2.88                 | -9.63;3.87 | 0.40 | 2.61        | -6.01;11.2 | 0.55 | 0.66                  | -5.52;6.83 | 0.83 |
| FVC (L)          |             |            |      |                       |            | P    |             |            |      |                       |            |      |
| CC-11050         | -0.04       | -0.41;0.33 | 0.82 | 0.07                  | -0.18;0.32 | 0.59 | 0.07        | -0.30;0.43 | 0.71 | 0.18                  | -0.08;0.45 | 0.18 |
| Everolimus       | 0.08        | -0.29;0.45 | 0.68 | 0.09                  | -0.16;0.34 | 0.49 | 0.08        | -0.29;0.45 | 0.68 | 0.10                  | -0.17;0.37 | 0.47 |
| Auranofin        | -0.11       | -0.48;0.25 | 0.54 | -0.03                 | -0.27;0.22 | 0.82 | -0.12       | -0.49;0.25 | 0.52 | -0.02                 | -0.29;0.25 | 0.89 |
| Ergocalciferol   | -0.14       | -0.50;0.23 | 0.46 | -0.06                 | -0.30;0.19 | 0.65 | -0.18       | -0.55;0.19 | 0.33 | -0.04                 | -0.31;0.23 | 0.77 |

Mean values indicate difference from controls. <sup>a</sup>FEV1 analyses were adjusted for baseline differences in FEV1. FVC analyses were adjusted for baseline differences in FVC.

**Table S5.** Spirometry outcomes in the per protocol (PP) population, including an adjustment for site.

| Treatment<br>Arm | At 2 months |            |      |                       |            |      | At 6 months |            |      |                       |            |      |
|------------------|-------------|------------|------|-----------------------|------------|------|-------------|------------|------|-----------------------|------------|------|
|                  | Unadjusted  |            |      | Adjusted <sup>a</sup> |            |      | Unadjusted  |            |      | Adjusted <sup>a</sup> |            |      |
| FEV1 (%)         | Mean        | 95% CI     | P    | Mean                  | 95% CI     | P    | Mean        | 95% CI     | P    | Mean                  | 95% CI     | P    |
| CC-11050         | 3.54        | -5.57;12.7 | 0.44 | 1.68                  | -5.19;8.55 | 0.63 | 8.40        | -0.24;17.0 | 0.06 | 6.32                  | 0.12;12.5  | 0.05 |
| Everolimus       | 5.63        | -3.68;14.9 | 0.23 | 0.52                  | -6.51;7.56 | 0.88 | 11.7        | 2.84;20.5  | 0.01 | 6.70                  | 0.36;13.0  | 0.04 |
| Auranofin        | -6.17       | -15.3;2.95 | 0.18 | -5.00                 | -11.8;1.83 | 0.15 | -3.70       | -12.4;5.00 | 0.40 | -2.56                 | -8.77;3.64 | 0.42 |
| Ergocalciferol   | -0.64       | -9.76;8.48 | 0.89 | -2.71                 | -9.55;4.12 | 0.43 | 2.35        | -6.34;11.1 | 0.59 | 0.66                  | -5.55;6.87 | 0.83 |
| <b>FVC (L)</b>   |             |            |      |                       |            |      |             |            |      |                       |            |      |
| CC-11050         | -0.04       | -0.41;0.32 | 0.82 | 0.07                  | -0.18;0.32 | 0.58 | 0.07        | -0.30;0.43 | 0.71 | 0.18                  | -0.09;0.45 | 0.19 |
| Everolimus       | 0.11        | -0.26;0.48 | 0.57 | 0.11                  | -0.14;0.37 | 0.37 | 0.09        | -0.28;0.47 | 0.62 | 0.11                  | -0.17;0.38 | 0.44 |
| Auranofin        | -0.14       | -0.50;0.23 | 0.45 | -0.03                 | -0.28;0.22 | 0.81 | -0.12       | -0.49;0.25 | 0.52 | -0.01                 | -0.28;0.26 | 0.93 |
| Ergocalciferol   | -0.15       | -0.51;0.22 | 0.43 | -0.04                 | -0.29;0.21 | 0.74 | -0.20       | -0.57;0.17 | 0.29 | -0.04                 | -0.31;0.23 | 0.78 |

Mean values indicate difference from controls. <sup>a</sup>FEV1 analyses were adjusted for baseline differences in FEV1 and site. FVC analyses were adjusted for baseline differences in FVC and site.

**Table S6.** Effects on FEV1 at 6 months considering only ATS/ERS grade categories A-D.

| Treatment arm  | N  | Mean FEV1 | Unadjusted                   |              |      | Adjusted <sup>a</sup>        |             |      |
|----------------|----|-----------|------------------------------|--------------|------|------------------------------|-------------|------|
|                |    |           | Mean difference from control | 95% CI       | P    | Mean difference from control | 95% CI      | P    |
| Control        | 37 | 68.9%     | 0                            |              |      | 0                            |             |      |
| CC-11050       | 36 | 77.8%     | 8.80                         | -.25; 17.86  | 0.06 | 7.08                         | 0.71; 13.46 | 0.03 |
| Everolimus     | 30 | 80.1%     | 11.15                        | 1.65; 20.65  | 0.02 | 6.67                         | -.01; 13.35 | 0.05 |
| Auranofin      | 32 | 65.8%     | -3.13                        | -12.47; 6.20 | 0.51 | -3.31                        | -9.84; 3.21 | 0.32 |
| Ergocalciferol | 35 | 72.5%     | 3.57                         | -5.55; 12.69 | 0.44 | 2.06                         | -4.32; 8.44 | 0.52 |

The primary analysis of FEV1 considered American Thoracic Society/European Respiratory Society grades A-E acceptable, and U-F unacceptable. Using that threshold, all but 1 patient could perform spirometry acceptably for FEV1 on day 1. However, 24.2% of these evaluations were grade E, the lowest acceptable grade, due to a difference between the 2 highest attempts >0.200L. This proportion decreased progressively to 9.6% at day 180, presumably as an effect of treatment. To assess the potential influence of uncertainty regarding measurement of FEV1 on study findings, we performed a post-hoc analysis in which only grades A-D were considered (above). The analysis examined differences from control at month 6, before and after adjustment for differences in day 1 FEV1 values. These results confirmed the findings of the primary analysis. <sup>a</sup>Analyses were adjusted for baseline differences in FEV1.

**Table S7.** Effects on FEV1 over time in the mITT population using a random effects model.

| Treatment arm  | Difference from control for the slope parameter |             |         |
|----------------|-------------------------------------------------|-------------|---------|
|                | Coefficient                                     | 95% CI      | P-value |
| CC-11050       | .030                                            | .004; .055  | 0.021   |
| Everolimus     | .022                                            | -.003; .048 | 0.083   |
| Auranofin      | .000                                            | -.025; .025 | 0.999   |
| Ergocalciferol | .016                                            | -.009; .041 | 0.218   |

We fit a random effects model for the repeated measurements of FEV1% linearly associated with study day to day 180. It included an interaction between study arm and day. The significance level of the overall interaction was  $P=0.07$ . Table S7 shows the difference from control in the slope parameter according to treatment arm. A model using  $\ln(\text{FEV1}\%)$  performed similarly ( $P=.04$ ), as did others that included a quadratic term for day ( $P=.07$  to  $.08$ ). These findings are consistent with the analysis reported in table 3.

**Table S8.** Criteria for classifying radiographic extent of disease in tuberculosis.

Adapted from Diagnostic standards and classification of tuberculosis, National Tuberculosis Association, 1940

|                                                 |                           |                                     |                          |                          |
|-------------------------------------------------|---------------------------|-------------------------------------|--------------------------|--------------------------|
| Slight to moderate density lesions total volume | see note 1 below          | <input checked="" type="checkbox"/> |                          |                          |
|                                                 | between note 1 and 1 lung |                                     | <input type="checkbox"/> |                          |
|                                                 | >1 lung                   |                                     |                          | <input type="checkbox"/> |
| Dense or confluent lesions total volume         | 0                         | <input checked="" type="checkbox"/> |                          |                          |
|                                                 | between 0 and 1/3 lung    |                                     | <input type="checkbox"/> |                          |
|                                                 | >1/3 lung                 |                                     |                          | <input type="checkbox"/> |
| Cavity total diameter (see note 3 below)        | 0 cm                      | <input checked="" type="checkbox"/> |                          |                          |
|                                                 | between 0 and 4 cm        |                                     | <input type="checkbox"/> |                          |
|                                                 | ≥4 cm                     |                                     |                          | <input type="checkbox"/> |
| Overall extent of disease                       | minimal                   | <input checked="" type="checkbox"/> |                          |                          |
|                                                 | moderately advanced       |                                     | <input type="checkbox"/> |                          |
|                                                 | far advanced              |                                     |                          | <input type="checkbox"/> |

Notes:

1. To qualify as minimal disease, lesions must be of slight to moderate density only, and must occupy no more than the volume defined by the 2nd chondrosternal junction and the spine of the fourth or the body of the fifth thoracic vertebra on one side (see below)
2. Please note that although total volume may be compared to that of 1 lung, it may be distributed across both lungs
3. If conventional full size films are used, total cavity diameter may be measured directly. For other image types, a scaling factor may be applied if one is provided. Otherwise, the width of the anterior portion of the 3<sup>rd</sup> or 4<sup>th</sup> rib may be used to approximate 1 cm.
4. All checks must be in white for minimal disease
5. Any checks in black result in far advanced disease
6. Everything else is moderately advanced disease

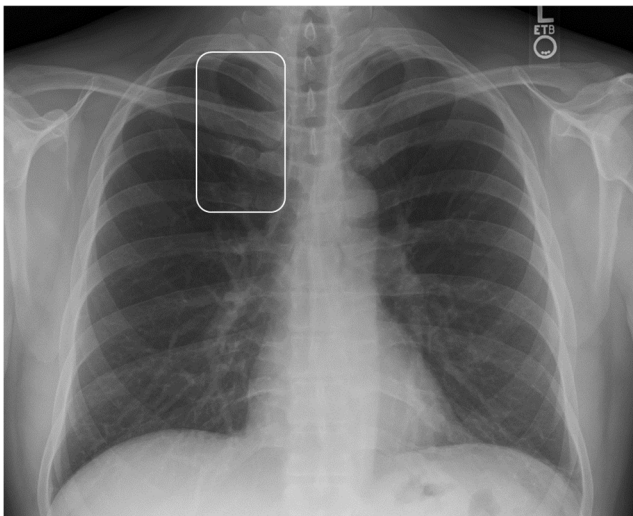

Natural history of pulmonary tuberculosis in the pre-chemotherapy era, according to radiographic extent of disease at diagnosis. From Alling DW and Bosworth EB. The after-history of pulmonary tuberculosis. ARRD 81:839-849, 1960.

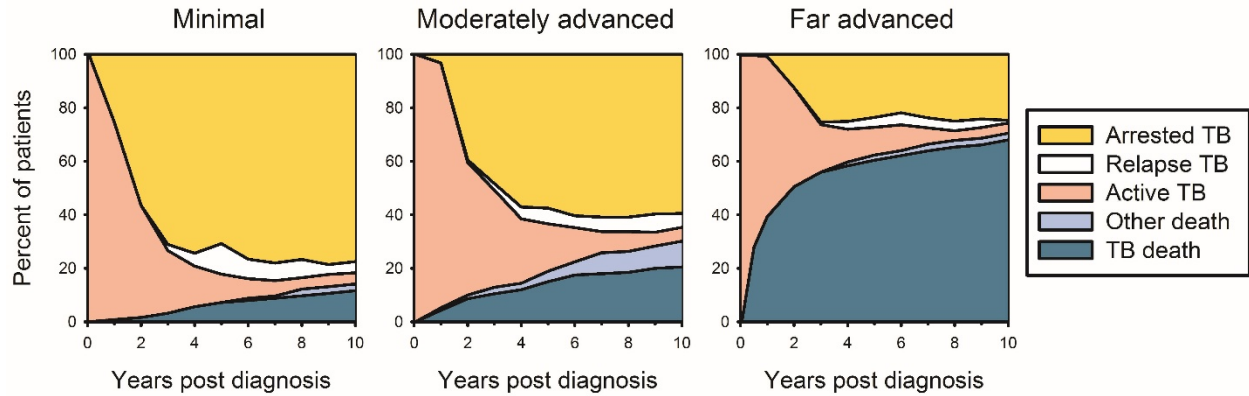

To be classified as “arrested TB”, constitutional symptoms must be absent, sputum if any, must be ... microscopically negative for tubercle bacilli, lesions stationary and apparently healed according to X-ray examination with no evidence of pulmonary cavity. These conditions shall have existed for a period of six months, during the last two of which the patient has been taking one hour's walking exercise twice daily or its equivalent. From Diagnostic standards and classification of tuberculosis, National Tuberculosis Association, 1940.
